# Supplementary material for: Ensuring representative sample volume predictions in microplastic monitoring
Source: Springer Nature journal article supplement (doi:10.1186/s43591-024-00109-2), 2025-01-22
Supplement: MOESM1 [file 43591_2024_109_MOESM1_ESM.xlsx]

## Sheet: 1. Minimum volume predictor
The RSVP Tool - Part 1: How much sample do I need to collect to capture a given number of particles?
Context: It is useful to estimate the minimum sample volume needed to capture a given number of microplastic particles in any environmental sample with a known confidence. The distribution of microplastics within a mixed body of water can be estimated based on an assumption of a random distribution pattern driven by processes such as turbulent diffusion where particles are independent of each oth…
How to use this tool: Gold highlighted cells are those which require user input. The user needs to input the unit used to report the concentration and expected concentration of microplastics (this can be a reported relevant concentration from the literature, but it is recommended to "err on the side of caution" and chose a lower number in cases of uncertainty) The volume required to capture k mic…
1. What unit is used to describe the sample size and concentration? (for example, L, m3, cm2, kg - both samples need to use the same units, convert if necessary)
	Sample unit used				Gold cells require user input - these change to white cells with green text when complete
2. Provide the concentration expected in your sample and the desired target minimum number of MP
	Estimated concentration MP/
	Minimum target number of particles to capture (k)
	Tip: the exact confidence level you require depends on your hypothesis, if you only want to detect presence of absence it may be sufficient to have a lower confidence level
	Significance level	Probability of finding at least the target particles	Expected number λ needed	Minimum sample size in
	0.1	0.9	-	-
	0.05	0.95	-	-
	0.01	0.99	-	-
	0.001	0.999	-	-
		-	-	-

## Sheet: 2. Do reported values differ
The RSVP Tool - Part 2: reviewing existing data - are two reported values without replication signficantly different from one another at a given level of confidence?
Context: Much of the reported data does not involve sample replication from the field, and so does not have any measure of the variability around each reported value. Tanaka et al., 2023 proposed an approach to estimate the confidence intervals around single measurements of microplastics in rivers based on the Poisson point process. This works on the principle that the particles are randomly dist…
How to use this tool: Gold highlighted cells are those which require user input. The user can select any two values from the literature that you wish to evaluate. The user must provide the units of the measurement, the concentration and the ammount of sample represented in each reported value Confidence intervals are then calculated based on the inverse gamma function and a summary table of these…
1. What unit is used to describe the sample size and concentration? (for example, L, m3, cm2, kg - both samples need to use the same units, convert if necessary)
	sample size unit used				Gold cells require user input - these change to white cells with green text when complete
2. Provide the concentration and ammount sampled to generate the parameters required to estimate confidence intervals for each reported concentration
		Sample 1	Sample 2	NOTE: the user can enter their own sample names if desired
	Concentration in MP/
	Amount sampled in
	Total number of microplastics in sample	0	0	NOTE: if one of these cells is highlighted in yellow, the total number of microplastics counted was <10 (after blank correction, if applied) and the estimation of confidence intervals based on the Poisson distribution should be treated with caution
	Shape parameter A (lower)	-	-
	Shape parameter A (upper)	-	-
	Rate parameter B	1	1
	The lower value is…	-		NOTE: This cell defines whether Value 1 or Value 2 is higher and therefore how to compare the overlap in CI (overlap is always calculated as the upper limit of the lowest value compared to the lower limit of the highest value)
3. Now the lower and upper limits of the confidence intervals are calculated for In (the intervals based on total microplastic numbers) and Ic (the intervals based on the concentration reported)
	Tips: - Predefined levels of confidence are already assiged based on common alpha values used in statistical analysis (0.1, 0.05, 0.01 and 0.001). The user may also define their own confidence level by filling in the orange highlighted cell - The figures to the right of the table are a visual guide to the width of the confidence intervals based on each defined confidence level. If the bars visibl…
	Significance level	Confidence coefficient	In		Ic
	α	(1-α)*100	Lower limit total MPs	Upper limit total MPs	Lower limit MP/	Upper limit MP/	Width of the confidence intervals
Sample 1	0.1	0.9	#VALUE!	#VALUE!	#VALUE!	#VALUE!	#VALUE!
	0.05	0.95	#VALUE!	#VALUE!	#VALUE!	#VALUE!	#VALUE!
	0.01	0.99	#VALUE!	#VALUE!	#VALUE!	#VALUE!	#VALUE!
	0.001	0.999	#VALUE!	#VALUE!	#VALUE!	#VALUE!	#VALUE!
		-	-	-	-	-	-
Sample 2	0.1	0.9	#VALUE!	#VALUE!	#VALUE!	#VALUE!	#VALUE!
	0.05	0.95	#VALUE!	#VALUE!	#VALUE!	#VALUE!	#VALUE!
	0.01	0.99	#VALUE!	#VALUE!	#VALUE!	#VALUE!	#VALUE!
	0.001	0.999	#VALUE!	#VALUE!	#VALUE!	#VALUE!	#VALUE!
	User defined	-	-	-	-	-	-
4. Summary table: use this to report the significance of any differences between the two reported concetrations								5. Summary graphs - where there is overlap between the two confidence intervals and so a significant difference is not observed, a red shaded area appears
	Are the two reported concentrations significantly different at defined levels of confidence?
	Significance level α	Outcome
	0.1	#VALUE!
	0.05	#VALUE!
	0.01	#VALUE!
	0.001	#VALUE!
	-	-
	Key to the equations:
					More details on the approach to determine the confidence intervals for a given expected concentration of microplastics using the inverse gamma function are available in Tanaka et al., 2023 (see the basic overview of the approach reproduced from Tanaka et al., 2023: left) Here we introduce an additional step after step [4], where the upper confidence interval of the lower value and lower confidenc…
	Fig. 1: reproduced from Tanaka et al. 2023 "An analytical approach to confidence interval estimation of river microplastic sampling"
	https://doi.org/10.1016/j.envpol.2023.122310

## Sheet: 3. Illustration
The related Poisson and Gamma distributions and different uses within the RSVP tool are illustrated in the following example.
In this example you have sampled from an environment, say a river, and captured 10 particles in one litre.
However, the λ (expected number of particles in the volume you sampled) for this reach of the river is actually 8.1 particles/L.
If you were to take sufficient replicate samples your average concentration would represent λ.
So what was the probability of you capturing exactly 10 particles in your sample? How likely is it that if you were to repeat your sampling, you would capture at least 10 particles next time?
The related Poisson and Gamma distributions can answer these questions.
In Figure 1, the probability mass function of capturing exactly 10 particles if the expected λ = 8.1 is ≈10.2%.
Therefore, if you were to repeat sample enough times, around 1 in every 10 times you sample from this environment, you might expect to capture exactly 10 particles.
The probability of capturing at least 10 particles next time you sample if the expected λ = 8.1 is ≈29.6% (Figure 2).
	Figure 1						Figure 2
								Illustration of the Poisson and Gamma distributions for expected value λ=	8.1
However, if the true concentration was lower, say λ = 3, the chance of capturing exactly 10 particles is now much lower, ≈0.08% (Figure 3)
The probability of capturing at least 10 particles is also very low at ≈0.11% (Figure 4).
	Figure 3						Figure 4
								Illustration of the Poisson and Gamma distributions for expected value λ=	3
It follows that capturing exactly 10 particles in a litre is possible at a whole range of actual environmental concentrations, but gets less likely the further away from 10 the expected value λ is.
The question can now be turned around from:
Knowing the expected value λ, "what is the probability of catching a particular integer number n particles?" to "Knowing that I caught exactly n particles, which range of λ could this have come from with a 95% certainty"
Returning to our example of the river, if we captured 45 particles in 5 litres, we might think that the river concentration was also 9 particles /L (i.e. 45 particles in 5L), but catching 45 particles in 5L when the actual concentration was sligthly higher or lower than 9 particles/L is also quite likely. Using the equations given in Tanaka et al., 2023 an interval can be calculated that contains…
Calculation of these confidence intervals is based on the approach from Tanaka et al., 2023 and a summary of the approach is reproduced below.
	Figure 5: reproduced from Tanaka et al. 2023 "An analytical approach to confidence interval estimation of river microplastic sampling"
	https://doi.org/10.1016/j.envpol.2023.122310
From this, we are able to compute the confidence intervals in our scenario at select significance levels (Tab 2 of the RSVP Tool - "2. Do reported values differ").
For example, at a significance level of 0.05, if we were to take 5L of sample and report a concentration of 9 MP/L, we would estimate the lower and upper confidence intervals to range from 6.57 MP/L to 12.04 MP/L.
	Significance level	Confidence coefficient	In		Ic
	α	(1-α)*100	Lower limit total MPs	Upper limit total MPs	Lower limit MP/L	Upper limit MP/L	Width of the confidence intervals
	0.1	0.9	34.563	57.6949	6.9126	11.539	4.62638
	0.05	0.95	32.8233	60.2135	6.56466	12.0427	5.47805
	0.01	0.99	29.5982	65.3405	5.91963	13.0681	7.14848
	0.001	0.999	26.1379	71.6347	5.22758	14.3269	9.09936
If we imagine that this first sample came from a preliminary study and we now wanted to target capturing and measuring at least 50 particles in each sample (e.g. the recommended target number of particles to reduce sampling errors to within +/- 30%, Tanaka et al., 2023), we could use Part 1 of the RSVP Tool "1. Minimum volume predictor". Here, the volume needed to be collected next time we sample…
	Estimated concentration MP/L			9
	Minimum target number of particles to capture (k)			50
	Significance level	Probability of finding at least the target 50 particles		Expected number λ needed		Minimum sample size in L
	0.1	0.9		59.249		6.58322
	0.05	0.95		62.1711		6.9079
	0.01	0.99		67.9034		7.54482
	0.001	0.999		74.7246		8.30274

## Sheet: graph helper (hide)
	Sample 1	Sample 2				The lower value is…	-
Concentration in MP/	0	0				sample size unit used	MP/								α=0.1				α=0.05				α=0.01				α=0.001				α=User defined
0	α	(1-α)*100	Lower limit total MPs	Upper limit total MPs	Lower limit MP/	Upper limit MP/	Width of the confidence intervals								Sample 1	overlap	Sample 2		Sample 1	overlap	Sample 2		Sample 1	overlap	Sample 2		Sample 1	overlap	Sample 2			overlap
Sample 1	0.1	0.9	#VALUE!	#VALUE!	#VALUE!	#VALUE!	#VALUE!				"low price"		Lower limit MP/L		#VALUE!	#VALUE!	#VALUE!	Lower limit MP/L	#VALUE!	#VALUE!	#VALUE!	Lower limit MP/L	#VALUE!	#VALUE!	#VALUE!	Lower limit MP/L	#VALUE!	#VALUE!	#VALUE!	Lower limit MP/L	-	-	-
	0.05	0.95	#VALUE!	#VALUE!	#VALUE!	#VALUE!	#VALUE!				"high price"		Upper limit MP/L		#VALUE!	#VALUE!	#VALUE!	Upper limit MP/L	#VALUE!	#VALUE!	#VALUE!	Upper limit MP/L	#VALUE!	#VALUE!	#VALUE!	Upper limit MP/L	#VALUE!	#VALUE!	#VALUE!	Upper limit MP/L	-	-	-
	0.01	0.99	#VALUE!	#VALUE!	#VALUE!	#VALUE!	#VALUE!				"closing price"		concentration		0		0	concentration	0		0	concentration	0		0	concentration	0		0	concentration	0		0
	0.001	0.999	#VALUE!	#VALUE!	#VALUE!	#VALUE!	#VALUE!
	0	-	-	-	-	-	-
Sample 2	0.1	0.9	#VALUE!	#VALUE!	#VALUE!	#VALUE!	#VALUE!								Upper limit MP/L	Lower limit MP/L	concentration
	0.05	0.95	#VALUE!	#VALUE!	#VALUE!	#VALUE!	#VALUE!						sample 1		14.741	3.78351	8
	0.01	0.99	#VALUE!	#VALUE!	#VALUE!	#VALUE!	#VALUE!						sample 2		7.25098	4.91069	6
	0.001	0.999	#VALUE!	#VALUE!	#VALUE!	#VALUE!	#VALUE!								"high price"	"low price"	"closing price"
	User defined	-	-	-	-	-	-
															Sample 1		Sample 2		Sample 1		Sample 2		Sample 1		Sample 2		Sample 1		Sample 2
	Are the two reported concentrations significantly different at defined levels of confidence?															α=0.1				α=0.05				α=0.01				α=0.001				α=User defined
	Significance level α	Outcome											Lower limit MP/L		#VALUE!	#VALUE!	#VALUE!	Lower limit MP/L	#VALUE!	#VALUE!	#VALUE!	Lower limit MP/L	#VALUE!	#VALUE!	#VALUE!	Lower limit MP/L	#VALUE!	#VALUE!	#VALUE!	Lower limit MP/L	-	-	-
	0.1	#VALUE!											conc-lower limit		#VALUE!		#VALUE!	conc-lower limit	#VALUE!		#VALUE!	conc-lower limit	#VALUE!		#VALUE!	conc-lower limit	#VALUE!		#VALUE!	conc-lower limit	#VALUE!		#VALUE!
	0.05	#VALUE!											upper limit-conc		#VALUE!	#VALUE!	#VALUE!	upper limit-conc	#VALUE!	#VALUE!	#VALUE!	upper limit-conc	#VALUE!	#VALUE!	#VALUE!	upper limit-conc	#VALUE!	#VALUE!	#VALUE!	upper limit-conc	#VALUE!	#VALUE!	#VALUE!
	0.01	#VALUE!
	0.001	#VALUE!
	-	-

## Sheet: Sheet2
Target	P(k) (%)					10	Target	#
1	0.999955					10	λ	#/m3
2	0.999501					0.54207	Probability of catching at least 10 particles in 1m3
3	0.997231					#N/A
4	0.989664					0.989664
5	0.970747
6	0.932914
7	0.869859
8	0.779779
9	0.66718
10	0.54207
11	0.41696
12	0.303224
13	0.208444
14	0.135536
15	0.0834585
16	0.0487404
17	0.0270416
18	0.0142776
19	0.0071865
20	0.00345434

## Sheet: Sheet1
Cumulative poisson distribution
Probability of NOT catching the minimum number = POISSON.DIST(T-1,λ*,TRUE)
Probability of catching at least the minimum number =1- POISSON.DIST(T-1,λ*,TRUE)						#REF!
We need to find λ*, so that POISSON.DIST(T-1,λ*,TRUE) is for example 5%
					10	Target	#
					20	λ	#/m3
					0.995005	Probability of catching at least 10 particles in 1m3

## Sheet: helper
Probability of EXACTLY n particles			1							1	#N/A																P(at least k)		(steps)	P(at least k)	Expected value:	λ	8.1							Gamma.dist(x,alpha,beta)
k	P(k)incl err		final prob	Poisson	cumulative Poisson	gamma prob	gamma prob cumulative	Poisson P(at least k)	k<target?			λ^k	(λ/fudge)^k	exponent(fudge^k)	(λ/fudge)^k/(coefficient (k!)	final exponent (fromfudge and k)	coefficient of k!	exponent of k!	factorial		factorial				k	Gamma	Gamma		Poisson	Poisson		target min k	0		(particles per L)		(volume collected in L)			x=λ	alpha=n+1	beta=1
0	0.000303539		0.000303539	0.000303539	0.000303539	0.000303539	0.000303539	1	0	0		1	1	0	1	0	1	0	1		1	0			0	0.000303539	1	-0.5	0	0
1	0.00245867		0.00245867	0.00245867	0.00276221	0.00245867	0.00276221	0.999696	0	0		8.1	0.81	1	0.81	1	1	0	1		1				0.1	0.000393299	0.999996	-0.5	0.000303539	1					Expected value λ=8.1
2	0.0099576		0.0099576	0.0099576	0.0127198	0.0099576	0.0127198	0.997238	0	0		65.61	0.6561	2	0.32805	2	2	0	2		2				0.2	0.00050233	0.999989	0.5	0.000303539	1
3	0.0268855		0.0268855	0.0268855	0.0396053	0.0268855	0.0396053	0.98728	0	0		531.441	0.531441	3	0.0885735	3	6	0	6		6				0.3	0.00063349	0.999978	0.5	0	0		e^-λ	0.000303539
4	0.0544432		0.0544432	0.0544432	0.0940485	0.0544432	0.0940485	0.960395	0	0		4304.67	0.430467	4	0.179361	3	2.4	1	24		24				0.4	0.000789871	0.999963	0.5	0.00245867	0.999696		coefficient(e^-λ)	3.03539
5	0.088198		0.088198	0.088198	0.182246	0.088198	0.182246	0.905951	0	0		34867.8	0.348678	5	0.290565	3	1.2	2	120		120				0.5	0.000974793	0.999943	1.5	0.00245867	0.999696		exponent(e^-λ)	-4
6	0.119067		0.119067	0.119067	0.301314	0.119067	0.301314	0.817754	0	0		282430	0.28243	6	0.0392263	4	7.2	2	720		720				0.6	0.0011918	0.999915	1.5	0	0
7	0.137778		0.137778	0.137778	0.439092	0.137778	0.439092	0.698686	0	0		2.28768e+06	0.228768	7	0.0453905	4	5.04	3	5040		5040				0.7	0.00144465	0.999879	1.5	0.0099576	0.997238		fudge ex	1
8	0.1395		0.1395	0.1395	0.578592	0.1395	0.578592	0.560908	0	0		1.85302e+07	0.185302	8	0.0459578	4	4.032	4	40320		40320				0.8	0.0017373	0.999832	2.5	0.0099576	0.997238		fudge	10
9	0.12555		0.12555	0.12555	0.704142	0.12555	0.704142	0.421408	0	0		1.50095e+08	0.150095	9	0.0413621	4	3.6288	5	362880		362880				0.9	0.00207387	0.999772	2.5	0	0		λ/fudge	0.81
10	0.101696		0.101696	0.101696	0.805837	0.101696	0.805837	0.295858	0	0		1.21577e+09	0.121577	10	0.0335033	4	3.6288	6	3628800		3628800				1	0.00245867	0.999696	2.5	0.0268855	0.98728
11	0.0748849		0.0748849	0.0748849	0.880722	0.0748849	0.880722	0.194163	0	0		9.84771e+09	0.0984771	11	0.0246706	4	3.99168	7	39916800		39916800				1.1	0.00289611	0.999602	3.5	0.0268855	0.98728	Excel can only calculate to a certain number of decimal points, so we needed to divide by a large number and then multiply again.
12	0.0505473		0.0505473	0.0505473	0.931269	0.0505473	0.931269	0.119278	0	0		7.97664e+10	0.0797664	12	0.0166526	4	4.79002	8	4.79002e+08		479001600				1.2	0.00339073	0.999486	3.5	0	0
13	0.0314949		0.0314949	0.0314949	0.962764	0.0314949	0.962764	0.0687307	0	0		6.46108e+11	0.0646108	13	0.0103759	4	6.22702	9	6227020800		6227020800				1.3	0.00394713	0.999345	3.5	0.0544432	0.960395
14	0.018222		0.018222	0.018222	0.980986	0.018222	0.980986	0.0372358	0	0		5.23348e+12	0.0523348	14	0.00600319	4	8.71783	10	87178291200		87178291200				1.4	0.00456997	0.999174	4.5	0.0544432	0.960395
15	0.00983989		0.00983989	0.00983989	0.990826	0.00983989	0.990826	0.0190138	0	0		4.23912e+13	0.0423912	15	0.0324172	3	1.30767	12	1307674368000		1307674368000				1.5	0.00526388	0.998968	4.5	0	0
16	0.00498145		0.00498145	0.00498145	0.995808	0.00498145	0.995808	0.0091739	0	0		3.43368e+14	0.0343368	16	0.0164112	3	2.09228	13	20922789888000		20922789888000				1.6	0.00603349	0.998724	4.5	0.088198	0.905951
17	0.00237351		0.00237351	0.00237351	0.998181	0.00237351	0.998181	0.00419246	0	0		2.78128e+15	0.0278128	17	0.00781946	3	3.55687	14	355687428096000		355687428096000				1.7	0.00688334	0.998435	5.5	0.088198	0.905951
18	0.00106808		0.00106808	0.00106808	0.999249	0.00106808	0.999249	0.00181894	0	0		2.25284e+16	0.0225284	18	0.00351876	3	6.40237	15	6402373705728000		6402373705728000				1.8	0.00781784	0.998095	5.5	0	0
19	0.00045534		0.00045534	0.00045534	0.999704	0.00045534	0.999704	0.000750862	0	0		1.8248e+17	0.018248	19	0.015001	2	1.21645	17	1.21645e+17		1.21645e+17				1.9	0.00884124	0.997698	5.5	0.119067	0.817754
20	0.000184413		0.000184413	0.000184413	0.999889	0.000184413	0.999889	0.000295523	0	0		1.47809e+18	0.0147809	20	0.00607541	2	2.4329	18	2.4329e+18		2.4329e+18				2	0.0099576	0.997238	6.5	0.119067	0.817754
21	7.11306e-05		7.11306e-05	7.11306e-05	0.99996	7.11306e-05	0.99996	0.00011111	0	0		1.19725e+19	0.0119725	21	0.00234337	2	5.10909	19	5.10909e+19		5.10909e+19				2.1	0.0111707	0.996706	6.5	0	0
22	2.6189e-05		2.6189e-05	2.6189e-05	0.999986	2.6189e-05	0.999986	3.99795e-05	0	0		9.69774e+19	0.00969774	22	0.00862787	1	1.124	21	1.124e+21		1.124e+21				2.2	0.012484	0.996096	6.5	0.137778	0.698686
23	9.22307e-06		9.22307e-06	9.22307e-06	0.999995	9.22307e-06	0.999995	1.37905e-05	0	0		7.85517e+20	0.00785517	23	0.00303851	1	2.5852	22	2.5852e+22		2.5852e+22				2.3	0.0139008	0.995398	7.5	0.137778	0.698686
24	3.11279e-06		3.11279e-06	3.11279e-06	0.999999	3.11279e-06	0.999999	4.56745e-06	0	0		6.36269e+21	0.00636269	24	0.0010255	1	6.20448	23	6.20448e+23		6.20448e+23				2.4	0.0154236	0.994604	7.5	0	0
25	1.00854e-06		1.00854e-06	1.00854e-06	1	1.00854e-06	1	1.45466e-06	0	0		5.15378e+22	0.00515378	25	0.00332261	0	1.55112	25	1.55112e+25		1.55112e+25				2.5	0.017055	0.993704	7.5	0.1395	0.560908
26	3.142e-07		3.142e-07	3.142e-07	1	3.142e-07	1	4.46118e-07	0	0		4.17456e+23	0.00417456	26	0.00103512	0	4.03291	26	4.03291e+26		4.03291e+26				2.6	0.0187966	0.99269	8.5	0.1395	0.560908
27	9.426e-08		9.426e-08	9.426e-08	1	9.426e-08	1	1.31918e-07	0	0		3.38139e+24	0.00338139	27	0.00310537	-1	1.08889	28	1.08889e+28		1.08889e+28				2.7	0.02065	0.991551	8.5	0	0
28	2.72681e-08		2.72681e-08	2.72681e-08	1	2.72681e-08	1	3.76577e-08	0	0		2.73893e+25	0.00273893	28	0.000898338	-1	3.04888	29	3.04888e+29		3.04888e+29				2.8	0.0226159	0.990277	8.5	0.12555	0.421408
29	7.61625e-09		7.61625e-09	7.61625e-09	1	7.61625e-09	1	1.03897e-08	0	0		2.21853e+26	0.00221853	29	0.000250915	-1	8.84176	30	8.84176e+30		8.84176e+30				2.9	0.0246945	0.988857	9.5	0.12555	0.421408
30	2.05639e-09		2.05639e-09	2.05639e-09	1	2.05639e-09	1	2.77342e-09	0	0		1.79701e+27	0.00179701	30	0.000677471	-2	2.65253	32	2.65253e+32		2.65253e+32				3	0.0268855	0.98728	9.5	0	0
31	5.37314e-10		5.37314e-10	5.37314e-10	1	5.37314e-10	1	7.17029e-10	0	0		1.45558e+28	0.00145558	31	0.000177017	-2	8.22284	33	8.22284e+33		8.22284e+33				3.1	0.029188	0.985535	9.5	0.101696	0.295858
32	1.36008e-10		1.36008e-10	1.36008e-10	1	1.36008e-10	1	1.79714e-10	0	0		1.17902e+29	0.00117902	32	0.000448073	-3	2.63131	35	2.63131e+35		2.63131e+35				3.2	0.0316002	0.983612	10.5	0.101696	0.295858
33	3.33837e-11		3.33837e-11	3.33837e-11	1	3.33837e-11	1	4.37066e-11	0	0		9.55005e+29	0.000955005	33	0.000109982	-3	8.68332	36	8.68332e+36		8.68332e+36				3.3	0.0341201	0.981497	10.5	0	0
34	7.95318e-12		7.95318e-12	7.95318e-12	1	7.95318e-12	1	1.03229e-11	0	0		7.73554e+30	0.000773554	34	0.000262015	-4	2.95233	38	2.95233e+38		2.95233e+38				3.4	0.0367445	0.97918	10.5	0.0748849	0.194163
35	1.84059e-12		1.84059e-12	1.84059e-12	1	1.84059e-12	1	2.36966e-12	0	0		6.26579e+31	0.000626579	35	0.000606377	-5	1.03331	40	1.03331e+40		1.03331e+40				3.5	0.0394701	0.976649	11.5	0.0748849	0.194163
36	4.14133e-13		4.14133e-13	4.14133e-13	1	4.14133e-13	1	5.29132e-13	0	0		5.07529e+32	0.000507529	36	0.000136435	-5	3.71993	41	3.71993e+41		3.71993e+41				3.6	0.0422925	0.973894	11.5	0	0
37	9.06616e-14		9.06616e-14	9.06616e-14	1	9.06616e-14	1	1.15019e-13	0	0		4.11098e+33	0.000411098	37	0.000298682	-6	1.37638	43	1.37638e+43		1.37638e+43				3.7	0.0452068	0.970901	11.5	0.0505473	0.119278
38	1.93252e-14		1.93252e-14	1.93252e-14	1	1.93252e-14	1	2.44249e-14	0	0		3.3299e+34	0.00033299	38	6.36664e-05	-6	5.23023	44	5.23023e+44		5.23023e+44				3.8	0.0482075	0.967661	12.5	0.0505473	0.119278
39	4.0137e-15		4.0137e-15	4.0137e-15	1	4.0137e-15	1	5.10703e-15	0	0		2.69722e+35	0.000269722	39	0.00013223	-7	2.03979	46	2.03979e+46		2.03979e+46				3.9	0.0512886	0.964162	12.5	0	0
40	8.12775e-16		8.12775e-16	8.12775e-16	1	8.12775e-16	1	0	0	0		2.18475e+36	0.000218475	40	2.67766e-05	-7	8.15915	47	8.15915e+47		8.15915e+47				4	0.0544432	0.960395	12.5	0.0314949	0.0687307
41	1.60573e-16		1.60573e-16	1.60573e-16	1	1.60573e-16	1	0	0	0		1.76964e+37	0.000176964	41	5.29001e-05	-8	3.34525	49	3.34525e+49		3.34525e+49				4.1	0.057664	0.956348	13.5	0.0314949	0.0687307
42	3.09676e-17		3.09676e-17	3.09676e-17	1	3.09676e-17	1	0	0	0		1.43341e+38	0.000143341	42	0.000102022	-9	1.40501	51	1.40501e+51		1.40501e+51				4.2	0.0609433	0.952011	13.5	0	0
43	5.83343e-18		5.83343e-18	5.83343e-18	1	5.83343e-18	1	0	0	0		1.16106e+39	0.000116106	43	1.9218e-05	-9	6.04153	52	6.04153e+52		6.04153e+52				4.3	0.0642727	0.947377	13.5	0.018222	0.0372358
44	1.07388e-18		1.07388e-18	1.07388e-18	1	1.07388e-18	1	0	0	0		9.40461e+39	9.40461e-05	44	3.53787e-05	-10	2.65827	54	2.65827e+54		2.65827e+54				4.4	0.0676434	0.942435	14.5	0.018222	0.0372358
45	1.93299e-19		1.93299e-19	1.93299e-19	1	1.93299e-19	1	0	0	0		7.61773e+40	7.61773e-05	45	6.36816e-05	-11	1.19622	56	1.19622e+56		1.19622e+56				4.5	0.0710461	0.937179	14.5	0	0
46	3.40374e-20		3.40374e-20	3.40374e-20	1	3.40374e-20	1	0	0	0		6.17037e+41	6.17037e-05	46	1.12135e-05	-11	5.50262	57	5.50262e+57		5.50262e+57				4.6	0.0744715	0.931601	14.5	0.00983989	0.0190138
47	5.86601e-21		5.86601e-21	5.86601e-21	1	5.86601e-21	1	0	0	0		4.998e+42	4.998e-05	47	1.93254e-05	-12	2.58623	59	2.58623e+59		2.58623e+59				4.7	0.0779096	0.925694	15.5	0.00983989	0.0190138
48	9.8989e-22		9.8989e-22	9.8989e-22	1	9.8989e-22	1	0	0	0		4.04838e+43	4.04838e-05	48	3.26116e-05	-13	1.24139	61	1.24139e+61		1.24139e+61				4.8	0.0813502	0.919454	15.5	0	0
49	1.63635e-22		1.63635e-22	1.63635e-22	1	1.63635e-22	1	0	0	0		3.27919e+44	3.27919e-05	49	5.3909e-06	-13	6.08282	62	6.08282e+62		6.08282e+62				4.9	0.0847832	0.912874	15.5	0.00498145	0.0091739
50	2.65088e-23		2.65088e-23	2.65088e-23	1	2.65088e-23	1	0	0	0		2.65614e+45	2.65614e-05	50	8.73325e-06	-14	3.04141	64	3.04141e+64		3.04141e+64				5	0.088198	0.905951	16.5	0.00498145	0.0091739
51	4.21023e-24		4.21023e-24	4.21023e-24	1	4.21023e-24	1	0	0	0		2.15147e+46	2.15147e-05	51	1.38705e-05	-15	1.55112	66	1.55112e+66		1.55112e+66				5.1	0.0915841	0.898683	16.5	0	0
52	6.55824e-25		6.55824e-25	6.55824e-25	1	6.55824e-25	1	0	0	0		1.74269e+47	1.74269e-05	52	2.16059e-06	-15	8.06582	67	8.06582e+67		8.06582e+67				5.2	0.0949309	0.891068	16.5	0.00237351	0.00419246
53	1.0023e-25		1.0023e-25	1.0023e-25	1	1.0023e-25	1	0	0	0		1.41158e+48	1.41158e-05	53	3.30204e-06	-16	4.27488	69	4.27488e+69		4.27488e+69				5.3	0.0982281	0.883104	17.5	0.00237351	0.00419246
54	1.50345e-26		1.50345e-26	1.50345e-26	1	1.50345e-26	1	0	0	0		1.14338e+49	1.14338e-05	54	4.95305e-06	-17	2.30844	71	2.30844e+71		2.30844e+71				5.4	0.101465	0.874792	17.5	0	0
55	2.21417e-27		2.21417e-27	2.21417e-27	1	2.21417e-27	1	0	0	0		9.26139e+49	9.26139e-06	55	7.2945e-06	-18	1.26964	73	1.26964e+73		1.26964e+73				5.5	0.104632	0.866133	17.5	0.00106808	0.00181894
56	3.20263e-28		3.20263e-28	3.20263e-28	1	3.20263e-28	1	0	0	0		7.50172e+50	7.50172e-06	56	1.0551e-06	-18	7.10999	74	7.10999e+74		7.10999e+74				5.6	0.107718	0.85713	18.5	0.00106808	0.00181894
57	4.55111e-29		4.55111e-29	4.55111e-29	1	4.55111e-29	1	0	0	0		6.0764e+51	6.0764e-06	57	1.49935e-06	-19	4.05269	76	4.05269e+76		4.05269e+76				5.7	0.110714	0.847785	18.5	0	0
58	6.35586e-30		6.35586e-30	6.35586e-30	1	6.35586e-30	1	0	0	0		4.92188e+52	4.92188e-06	58	2.09392e-06	-20	2.35056	78	2.35056e+78		2.35056e+78				5.8	0.11361	0.838103	18.5	0.00045534	0.000750862
59	8.72584e-31		8.72584e-31	8.72584e-31	1	8.72584e-31	1	0	0	0		3.98672e+53	3.98672e-06	59	2.8747e-06	-21	1.38683	80	1.38683e+80		1.38683e+80				5.9	0.116397	0.828091	19.5	0.00045534	0.000750862
60	1.17799e-31		1.17799e-31	1.17799e-31	1	1.17799e-31	1	0	0	0		3.22925e+54	3.22925e-06	60	3.88084e-07	-21	8.32099	81	8.32099e+81		8.32099e+81				6	0.119067	0.817754	19.5	0	0
61	1.56421e-32		1.56421e-32	1.56421e-32	1	1.56421e-32	1	0	0	0		2.61569e+55	2.61569e-06	61	5.15325e-07	-22	5.0758	83	5.0758e+83		5.0758e+83				6.1	0.121612	0.807099	19.5	0.000184413	0.000295523
62	2.04357e-33		2.04357e-33	2.04357e-33	1	2.04357e-33	1	0	0	0		2.11871e+56	2.11871e-06	62	6.73248e-07	-23	3.147	85	3.147e+85		3.147e+85				6.2	0.124023	0.796137	20.5	0.000184413	0.000295523
63	2.62745e-34		2.62745e-34	2.62745e-34	1	2.62745e-34	1	0	0	0		1.71615e+57	1.71615e-06	63	8.65604e-07	-24	1.98261	87	1.98261e+87		1.98261e+87				6.3	0.126293	0.784876	20.5	0	0
64	3.32536e-35		3.32536e-35	3.32536e-35	1	3.32536e-35	1	0	0	0		1.39008e+58	1.39008e-06	64	1.09553e-06	-25	1.26887	89	1.26887e+89		1.26887e+89				6.4	0.128417	0.773327	20.5	7.11306e-05	0.00011111
65	4.14391e-36		4.14391e-36	4.14391e-36	1	4.14391e-36	1	0	0	0		1.12597e+59	1.12597e-06	65	1.3652e-07	-25	8.24765	90	8.24765e+90		8.24765e+90				6.5	0.130387	0.761502	21.5	7.11306e-05	0.00011111
66	5.08571e-37		5.08571e-37	5.08571e-37	1	5.08571e-37	1	0	0	0		9.12034e+59	9.12034e-07	66	1.67547e-07	-26	5.44345	92	5.44345e+92		5.44345e+92				6.6	0.132199	0.749412	21.5	0	0
67	6.1484e-38		6.1484e-38	6.1484e-38	1	6.1484e-38	1	0	0	0		7.38748e+60	7.38748e-07	67	2.02557e-07	-27	3.64711	94	3.64711e+94		3.64711e+94				6.7	0.133848	0.737071	21.5	2.6189e-05	3.99795e-05
68	7.32383e-39		7.32383e-39	7.32383e-39	1	7.32383e-39	1	0	0	0		5.98386e+61	5.98386e-07	68	2.41281e-07	-28	2.48004	96	2.48004e+96		2.48004e+96				6.8	0.135329	0.724494	22.5	2.6189e-05	3.99795e-05
69	8.59754e-40		8.59754e-40	8.59754e-40	1	8.59754e-40	1	0	0	0		4.84693e+62	4.84693e-07	69	2.83243e-07	-29	1.71122	98	1.71122e+98		1.71122e+98				6.9	0.13664	0.711693	22.5	0	0
70	9.94858e-41		9.94858e-41	9.94858e-41	1	9.94858e-41	1	0	0	0		3.92601e+63	3.92601e-07	70	3.27753e-07	-30	1.19786	100	1.19786e+100		1.19786e+100				7	0.137778	0.698686	22.5	9.22307e-06	1.37905e-05
71	1.13498e-41		1.13498e-41	1.13498e-41	1	1.13498e-41	1	0	0	0		3.18007e+64	3.18007e-07	71	3.73915e-08	-30	8.50479	101	8.50479e+101		8.50479e+101				7.1	0.13874	0.685488	23.5	9.22307e-06	1.37905e-05
72	1.27685e-42		1.27685e-42	1.27685e-42	1	1.27685e-42	1	0	0	0		2.57585e+65	2.57585e-07	72	4.20654e-08	-31	6.12345	103	6.12345e+103		6.12345e+103				7.2	0.139526	0.672114	23.5	0	0
73	1.41678e-43		1.41678e-43	1.41678e-43	1	1.41678e-43	1	0	0	0		2.08644e+66	2.08644e-07	73	4.66754e-08	-32	4.47012	105	4.47012e+105		4.47012e+105				7.3	0.140134	0.658583	23.5	3.11279e-06	4.56745e-06
74	1.5508e-44		1.5508e-44	1.5508e-44	1	1.5508e-44	1	0	0	0		1.69002e+67	1.69002e-07	74	5.10906e-08	-33	3.30789	107	3.30789e+107		3.30789e+107				7.4	0.140564	0.64491	24.5	3.11279e-06	4.56745e-06
75	1.67486e-45		1.67486e-45	1.67486e-45	1	1.67486e-45	1	0	0	0		1.36891e+68	1.36891e-07	75	5.51778e-08	-34	2.48091	109	2.48091e+109		2.48091e+109				7.5	0.140818	0.631114	24.5	0	0
76	1.78505e-46		1.78505e-46	1.78505e-46	1	1.78505e-46	1	0	0	0		1.10882e+69	1.10882e-07	76	5.8808e-08	-35	1.88549	111	1.88549e+111		1.88549e+111				7.6	0.140896	0.617213	24.5	1.00854e-06	1.45466e-06
77	1.87778e-47		1.87778e-47	1.87778e-47	1	1.87778e-47	1	0	0	0		8.98145e+69	8.98145e-08	77	6.18629e-08	-36	1.45183	113	1.45183e+113		1.45183e+113				7.7	0.140801	0.603223	25.5	1.00854e-06	1.45466e-06
78	1.95e-48		1.95e-48	1.95e-48	1	1.95e-48	1	0	0	0		7.27497e+70	7.27497e-08	78	6.42423e-08	-37	1.13243	115	1.13243e+115		1.13243e+115				7.8	0.140534	0.589164	25.5	0	0
79	1.99937e-49		1.99937e-49	1.99937e-49	1	1.99937e-49	1	0	0	0		5.89273e+71	5.89273e-08	79	6.58686e-09	-37	8.94618	116	8.94618e+116		8.94618e+116				7.9	0.140099	0.575053	25.5	3.142e-07	4.46118e-07
80	2.02436e-50		2.02436e-50	2.02436e-50	1	2.02436e-50	1	0	0	0		4.77311e+72	4.77311e-08	80	6.6692e-09	-38	7.15695	118	7.15695e+118		7.15695e+118				8	0.1395	0.560908	26.5	3.142e-07	4.46118e-07
81	2.02436e-51		2.02436e-51	2.02436e-51	1	2.02436e-51	1	0	0	0		3.86622e+73	3.86622e-08	81	6.6692e-09	-39	5.79713	120	5.79713e+120		5.79713e+120				8.1	0.13874	0.546748	26.5	0	0
82	1.99968e-52		1.99968e-52	1.99968e-52	1	1.99968e-52	1	0	0	0		3.13164e+74	3.13164e-08	82	6.58787e-09	-40	4.75364	122	4.75364e+122		4.75364e+122				8.2	0.137824	0.532589	26.5	9.426e-08	1.31918e-07
83	1.95149e-53		1.95149e-53	1.95149e-53	1	1.95149e-53	1	0	0	0		2.53663e+75	2.53663e-08	83	6.42913e-09	-41	3.94552	124	3.94552e+124		3.94552e+124				8.3	0.136757	0.518449	27.5	9.426e-08	1.31918e-07
84	1.88179e-54		1.88179e-54	1.88179e-54	1	1.88179e-54	1	0	0	0		2.05467e+76	2.05467e-08	84	6.19951e-09	-42	3.31424	126	3.31424e+126		3.31424e+126				8.4	0.135544	0.504346	27.5	0	0
85	1.79324e-55		1.79324e-55	1.79324e-55	1	1.79324e-55	1	0	0	0		1.66428e+77	1.66428e-08	85	5.90777e-09	-43	2.8171	128	2.8171e+128		2.8171e+128				8.5	0.134191	0.490296	27.5	2.72681e-08	3.76577e-08
86	1.68898e-56		1.68898e-56	1.68898e-56	1	1.68898e-56	1	0	0	0		1.34807e+78	1.34807e-08	86	5.5643e-09	-44	2.42271	130	2.42271e+130		2.42271e+130				8.6	0.132705	0.476317	28.5	2.72681e-08	3.76577e-08
87	1.5725e-57		1.5725e-57	1.5725e-57	1	1.5725e-57	1	0	0	0		1.09193e+79	1.09193e-08	87	5.18055e-09	-45	2.10776	132	2.10776e+132		2.10776e+132				8.7	0.13109	0.462423	28.5	0	0
88	1.44742e-58		1.44742e-58	1.44742e-58	1	1.44742e-58	1	0	0	0		8.84467e+79	8.84467e-09	88	4.76846e-09	-46	1.85483	134	1.85483e+134		1.85483e+134				8.8	0.129355	0.44863	28.5	7.61625e-09	1.03897e-08
89	1.31731e-59		1.31731e-59	1.31731e-59	1	1.31731e-59	1	0	0	0		7.16418e+80	7.16418e-09	89	4.33984e-09	-47	1.6508	136	1.6508e+136		1.6508e+136				8.9	0.127506	0.434954	29.5	7.61625e-09	1.03897e-08
90	1.18558e-60		1.18558e-60	1.18558e-60	1	1.18558e-60	1	0	0	0		5.80299e+81	5.80299e-09	90	3.90585e-09	-48	1.48572	138	1.48572e+138		1.48572e+138				9	0.12555	0.421408	29.5	0	0
91	1.0553e-61		1.0553e-61	1.0553e-61	1	1.0553e-61	1	0	0	0		4.70042e+82	4.70042e-09	91	3.47664e-09	-49	1.352	140	1.352e+140		1.352e+140				9.1	0.123494	0.408008	29.5	2.05639e-09	2.77342e-09
92	9.29119e-63		9.29119e-63	9.29119e-63	1	9.29119e-63	1	0	0	0		3.80734e+83	3.80734e-09	92	3.06095e-09	-50	1.24384	142	1.24384e+142		1.24384e+142				9.2	0.121345	0.394765	30.5	2.05639e-09	2.77342e-09
93	8.09233e-64		8.09233e-64	8.09233e-64	1	8.09233e-64	1	0	0	0		3.08395e+84	3.08395e-09	93	2.66599e-09	-51	1.15677	144	1.15677e+144		1.15677e+144				9.3	0.119111	0.381692	30.5	0	0
94	6.97318e-65		6.97318e-65	6.97318e-65	1	6.97318e-65	1	0	0	0		2.498e+85	2.498e-09	94	2.29729e-09	-52	1.08737	146	1.08737e+146		1.08737e+146				9.4	0.116799	0.368802	30.5	5.37314e-10	7.17029e-10
95	5.94555e-66		5.94555e-66	5.94555e-66	1	5.94555e-66	1	0	0	0		2.02338e+86	2.02338e-09	95	1.95874e-09	-53	1.033	148	1.033e+148		1.033e+148				9.5	0.114416	0.356105	31.5	5.37314e-10	7.17029e-10
96	5.01656e-67		5.01656e-67	5.01656e-67	1	5.01656e-67	1	0	0	0		1.63894e+87	1.63894e-09	96	1.65269e-10	-53	9.91678	149	9.91678e+149		9.91678e+149				9.6	0.11197	0.343612	31.5	0	0
97	4.18908e-68		4.18908e-68	4.18908e-68	1	4.18908e-68	1	0	0	0		1.32754e+88	1.32754e-09	97	1.38008e-10	-54	9.61928	151	9.61928e+151		9.61928e+151				9.7	0.109467	0.331332	31.5	1.36008e-10	1.79714e-10
98	3.46241e-69		3.46241e-69	3.46241e-69	1	3.46241e-69	1	0	0	0		1.07531e+89	1.07531e-09	98	1.14068e-10	-55	9.42689	153	9.42689e+153		9.42689e+153				9.8	0.106916	0.319275	32.5	1.36008e-10	1.79714e-10
99	2.83288e-70		2.83288e-70	2.83288e-70	1	2.83288e-70	1	0	0	0		8.70997e+89	8.70997e-10	99	9.33283e-11	-56	9.33262	155	9.33262e+155		9.33262e+155				9.9	0.104323	0.307448	32.5	0	0
100	2.29463e-71		2.29463e-71	2.29463e-71	1	2.29463e-71	1	0	0	0		7.05508e+90	7.05508e-10	100	7.55959e-11	-57	9.33262	157	9.33262e+157		9.33262e+157				10	0.101696	0.295858	32.5	3.33837e-11	4.37066e-11
101	1.84025e-72		1.84025e-72	1.84025e-72	1	1.84025e-72	1	0	0	0		5.71461e+91	5.71461e-10	101	6.06264e-11	-58	9.42595	159	9.42595e+159		9.42595e+159				10.1	0.0990396	0.284514	33.5	3.33837e-11	4.37066e-11
102	1.46137e-73		1.46137e-73	1.46137e-73	1	1.46137e-73	1	0	0	0		4.62884e+92	4.62884e-10	102	4.81445e-11	-59	9.61447	161	9.61447e+161		9.61447e+161				10.2	0.0963622	0.27342	33.5	0	0
103	1.14924e-74		1.14924e-74	1.14924e-74	1	1.14924e-74	1	0	0	0		3.74936e+93	3.74936e-10	103	3.78612e-11	-60	9.9029	163	9.9029e+163		9.9029e+163				10.3	0.0936697	0.262582	33.5	7.95318e-12	1.03229e-11
104	8.95078e-76		8.95078e-76	8.95078e-76	1	8.95078e-76	1	0	0	0		3.03698e+94	3.03698e-10	104	2.94881e-10	-62	1.0299	166	1.0299e+166		1.0299e+166				10.4	0.0909681	0.252004	34.5	7.95318e-12	1.03229e-11
105	6.90489e-77		6.90489e-77	6.90489e-77	1	6.90489e-77	1	0	0	0		2.45995e+95	2.45995e-10	105	2.27479e-10	-63	1.0814	168	1.0814e+168		1.0814e+168				10.5	0.0882636	0.241689	34.5	0	0
106	5.27638e-78		5.27638e-78	5.27638e-78	1	5.27638e-78	1	0	0	0		1.99256e+96	1.99256e-10	106	1.73829e-10	-64	1.14628	170	1.14628e+170		1.14628e+170				10.6	0.0855616	0.231642	34.5	1.84059e-12	2.36966e-12
107	3.99427e-79		3.99427e-79	3.99427e-79	1	3.99427e-79	1	0	0	0		1.61398e+97	1.61398e-10	107	1.3159e-10	-65	1.22652	172	1.22652e+172		1.22652e+172				10.7	0.0828678	0.221865	35.5	1.84059e-12	2.36966e-12
108	2.9957e-80		2.9957e-80	2.9957e-80	1	2.9957e-80	1	0	0	0		1.30732e+98	1.30732e-10	108	9.86924e-11	-66	1.32464	174	1.32464e+174		1.32464e+174				10.8	0.0801872	0.212358	35.5	0	0
109	2.22616e-81		2.22616e-81	2.22616e-81	1	2.22616e-81	1	0	0	0		1.05893e+99	1.05893e-10	109	7.33402e-11	-67	1.44386	176	1.44386e+176		1.44386e+176				10.9	0.0775247	0.203124	35.5	4.14133e-13	5.29132e-13
110	1.63926e-82		1.63926e-82	1.63926e-82	1	1.63926e-82	1	0	0	0		8.57733e+99	8.57733e-11	110	5.40051e-11	-68	1.58825	178	1.58825e+178		1.58825e+178				11	0.0748849	0.194163	36.5	4.14133e-13	5.29132e-13
111	1.19622e-83		1.19622e-83	1.19622e-83	1	1.19622e-83	1	0	0	0		6.94764e+100	6.94764e-11	111	3.94091e-11	-69	1.76295	180	1.76295e+180		1.76295e+180				11.1	0.0722722	0.185474	36.5	0	0
112	8.65124e-85		8.65124e-85	8.65124e-85	1	8.65124e-85	1	0	0	0		5.62759e+101	5.62759e-11	112	2.85012e-11	-70	1.97451	182	1.97451e+182		1.97451e+182				11.2	0.0696905	0.177058	36.5	9.06616e-14	1.15019e-13
113	6.20133e-86		6.20133e-86	6.20133e-86	1	6.20133e-86	1	0	0	0		4.55834e+102	4.55834e-11	113	2.04301e-11	-71	2.23119	184	2.23119e+184		2.23119e+184				11.3	0.0671437	0.168912	37.5	9.06616e-14	1.15019e-13
114	4.40621e-87		4.40621e-87	4.40621e-87	1	4.40621e-87	1	0	0	0		3.69226e+103	3.69226e-11	114	1.45161e-11	-72	2.54356	186	2.54356e+186		2.54356e+186				11.4	0.0646353	0.161035	37.5	0	0
115	3.1035e-88		3.1035e-88	3.1035e-88	1	3.1035e-88	1	0	0	0		2.99073e+104	2.99073e-11	115	1.02244e-11	-73	2.92509	188	2.92509e+188		2.92509e+188				11.5	0.0621683	0.153426	37.5	1.93252e-14	2.44249e-14
116	2.1671e-89		2.1671e-89	2.1671e-89	1	2.1671e-89	1	0	0	0		2.42249e+105	2.42249e-11	116	7.13944e-12	-74	3.39311	190	3.39311e+190		3.39311e+190				11.6	0.0597456	0.146081	38.5	1.93252e-14	2.44249e-14
117	1.5003e-90		1.5003e-90	1.5003e-90	1	1.5003e-90	1	0	0	0		1.96222e+106	1.96222e-11	117	4.94269e-12	-75	3.96994	192	3.96994e+192		3.96994e+192				11.7	0.05737	0.138997	38.5	0	0
118	1.02987e-91		1.02987e-91	1.02987e-91	1	1.02987e-91	1	0	0	0		1.5894e+107	1.5894e-11	118	3.39287e-12	-76	4.68453	194	4.68453e+194		4.68453e+194				11.8	0.0550437	0.132171	38.5	4.0137e-15	5.10703e-15
119	7.01002e-93		7.01002e-93	7.01002e-93	1	7.01002e-93	1	0	0	0		1.28741e+108	1.28741e-11	119	2.30943e-12	-77	5.57459	196	5.57459e+196		5.57459e+196				11.9	0.0527689	0.1256	39.5	4.0137e-15	5.10703e-15
120	4.73176e-94		4.73176e-94	4.73176e-94	1	4.73176e-94	1	0	0	0		1.0428e+109	1.0428e-11	120	1.55886e-12	-78	6.6895	198	6.6895e+198		6.6895e+198				12	0.0505473	0.119278	39.5	0	0
121	3.16754e-95		3.16754e-95	3.16754e-95	1	3.16754e-95	1	0	0	0		8.4467e+109	8.4467e-12	121	1.04354e-12	-79	8.0943	200	8.0943e+200		8.0943e+200				12.1	0.0483805	0.113202	39.5	8.12775e-16	0
122	2.10304e-96		2.10304e-96	2.10304e-96	1	2.10304e-96	1	0	0	0		6.84183e+110	6.84183e-12	122	6.9284e-13	-80	9.87504	202	9.87504e+202		9.87504e+202				12.2	0.0462699	0.107367	40.5	8.12775e-16	0
123	1.38493e-97		1.38493e-97	1.38493e-97	1	1.38493e-97	1	0	0	0		5.54188e+111	5.54188e-12	123	4.56261e-12	-82	1.21463	205	1.21463e+205		1.21463e+205				12.3	0.0442166	0.101768	40.5	0	0
124	9.04672e-99		9.04672e-99	9.04672e-99	1	9.04672e-99	1	0	0	0		4.48892e+112	4.48892e-12	124	2.98041e-12	-83	1.50614	207	1.50614e+207		1.50614e+207				12.4	0.0422214	0.0964001	40.5	1.60573e-16	0
125	5.86228e-100		5.86228e-100	5.86228e-100	1	5.86228e-100	1	0	0	0		3.63603e+113	3.63603e-12	125	1.93131e-12	-84	1.88268	209	1.88268e+209		1.88268e+209				12.5	0.040285	0.0912576	41.5	1.60573e-16	0
126	3.76861e-101		3.76861e-101	3.76861e-101	1	3.76861e-101	1	0	0	0		2.94518e+114	2.94518e-12	126	1.24156e-12	-85	2.37217	211	2.37217e+211		2.37217e+211				12.6	0.0384079	0.0863351	41.5	0	0
127	2.4036e-102		2.4036e-102	2.4036e-102	1	2.4036e-102	1	0	0	0		2.3856e+115	2.3856e-12	127	7.91858e-13	-86	3.01266	213	3.01266e+213		3.01266e+213				12.7	0.0365903	0.081627	41.5	3.09676e-17	0
128	1.52103e-103		1.52103e-103	1.52103e-103	1	1.52103e-103	1	0	0	0		1.93233e+116	1.93233e-12	128	5.01098e-13	-87	3.8562	215	3.8562e+215		3.8562e+215				12.8	0.0348324	0.0771274	42.5	3.09676e-17	0
129	9.55064e-105		9.55064e-105	9.55064e-105	1	9.55064e-105	1	0	0	0		1.56519e+117	1.56519e-12	129	3.14643e-13	-88	4.9745	217	4.9745e+217		4.9745e+217				12.9	0.033134	0.0728307	42.5	0	0
130	5.95078e-106		5.95078e-106	5.95078e-106	1	5.95078e-106	1	0	0	0		1.2678e+118	1.2678e-12	130	1.96047e-13	-89	6.46686	219	6.46686e+219		6.46686e+219				13	0.0314949	0.0687307	42.5	5.83343e-18	0
131	3.67949e-107		3.67949e-107	3.67949e-107	1	3.67949e-107	1	0	0	0		1.02692e+119	1.02692e-12	131	1.2122e-13	-90	8.47158	221	8.47158e+221		8.47158e+221				13.1	0.0299147	0.0648215	43.5	5.83343e-18	0
132	2.25787e-108		2.25787e-108	2.25787e-108	1	2.25787e-108	1	0	0	0		8.31807e+119	8.31807e-13	132	7.43848e-13	-92	1.11825	224	1.11825e+224		1.11825e+224				13.2	0.0283929	0.0610971	43.5	0	0
133	1.37509e-109		1.37509e-109	1.37509e-109	1	1.37509e-109	1	0	0	0		6.73764e+120	6.73764e-13	133	4.5302e-13	-93	1.48727	226	1.48727e+226		1.48727e+226				13.3	0.0269289	0.0575516	43.5	1.07388e-18	0
134	8.31213e-111		8.31213e-111	8.31213e-111	1	8.31213e-111	1	0	0	0		5.45748e+121	5.45748e-13	134	2.73841e-13	-94	1.99294	228	1.99294e+228		1.99294e+228				13.4	0.0255219	0.0541787	44.5	1.07388e-18	0
135	4.98728e-112		4.98728e-112	4.98728e-112	1	4.98728e-112	1	0	0	0		4.42056e+122	4.42056e-13	135	1.64304e-13	-95	2.69047	230	2.69047e+230		2.69047e+230				13.5	0.024171	0.0509726	44.5	0	0
136	2.97036e-113		2.97036e-113	2.97036e-113	1	2.97036e-113	1	0	0	0		3.58066e+123	3.58066e-13	136	9.78577e-14	-96	3.65904	232	3.65904e+232		3.65904e+232				13.6	0.0228753	0.0479272	44.5	1.93299e-19	0
137	1.7562e-114		1.7562e-114	1.7562e-114	1	1.7562e-114	1	0	0	0		2.90033e+124	2.90033e-13	137	5.78575e-14	-97	5.01289	234	5.01289e+234		5.01289e+234				13.7	0.0216337	0.0450366	45.5	1.93299e-19	0
138	1.03081e-115		1.03081e-115	1.03081e-115	1	1.03081e-115	1	0	0	0		2.34927e+125	2.34927e-13	138	3.39598e-14	-98	6.91779	236	6.91779e+236		6.91779e+236				13.8	0.0204451	0.0422951	45.5	0	0
139	6.0069e-117		6.0069e-117	6.0069e-117	1	6.0069e-117	1	0	0	0		1.90291e+126	1.90291e-13	139	1.97895e-14	-99	9.61572	238	9.61572e+238		9.61572e+238				13.9	0.0193083	0.0396967	45.5	3.40374e-20	0
140	3.47542e-118		3.47542e-118	3.47542e-118	1	3.47542e-118	1	0	0	0		1.54135e+127	1.54135e-13	140	1.14497e-13	-101	1.3462	241	1.3462e+241		1.3462e+241				14	0.018222	0.0372358	46.5	3.40374e-20	0
141	1.99652e-119		1.99652e-119	1.99652e-119	1	1.99652e-119	1	0	0	0		1.2485e+128	1.2485e-13	141	6.57747e-14	-102	1.89814	243	1.89814e+243		1.89814e+243				14.1	0.017185	0.0349068	46.5	0	0
142	1.13886e-120		1.13886e-120	1.13886e-120	1	1.13886e-120	1	0	0	0		1.01128e+129	1.01128e-13	142	3.75193e-14	-103	2.69536	245	2.69536e+245		2.69536e+245				14.2	0.016196	0.0327042	46.5	5.86601e-21	0
143	6.45088e-122		6.45088e-122	6.45088e-122	1	6.45088e-122	1	0	0	0		8.19139e+129	8.19139e-14	143	2.12522e-14	-104	3.85437	247	3.85437e+247		3.85437e+247				14.3	0.0152534	0.0306226	47.5	5.86601e-21	0
144	3.62862e-123		3.62862e-123	3.62862e-123	1	3.62862e-123	1	0	0	0		6.63503e+130	6.63503e-14	144	1.19544e-14	-105	5.55029	249	5.55029e+249		5.55029e+249				14.4	0.0143561	0.0286568	47.5	0	0
145	2.02702e-124		2.02702e-124	2.02702e-124	1	2.02702e-124	1	0	0	0		5.37437e+131	5.37437e-14	145	6.67796e-15	-106	8.04793	251	8.04793e+251		8.04793e+251				14.5	0.0135024	0.0268015	47.5	9.8989e-22	0
146	1.12458e-125		1.12458e-125	1.12458e-125	1	1.12458e-125	1	0	0	0		4.35324e+132	4.35324e-14	146	3.7049e-14	-108	1.175	254	1.175e+254		1.175e+254				14.6	0.0126911	0.0250519	48.5	9.8989e-22	0
147	6.19667e-127		6.19667e-127	6.19667e-127	1	6.19667e-127	1	0	0	0		3.52613e+133	3.52613e-14	147	2.04147e-14	-109	1.72725	256	1.72725e+256		1.72725e+256				14.7	0.0119206	0.0234029	48.5	0	0
148	3.39142e-128		3.39142e-128	3.39142e-128	1	3.39142e-128	1	0	0	0		2.85616e+134	2.85616e-14	148	1.11729e-14	-110	2.55632	258	2.55632e+258		2.55632e+258				14.8	0.0111895	0.02185	48.5	1.63635e-22	0
149	1.84366e-129		1.84366e-129	1.84366e-129	1	1.84366e-129	1	0	0	0		2.31349e+135	2.31349e-14	149	6.07387e-15	-111	3.80892	260	3.80892e+260		3.80892e+260			10 exponent	14.9	0.0104964	0.0203884	49.5	1.63635e-22	0
150	9.95575e-131		9.95575e-131	9.95575e-131	1	9.95575e-131	1	0	0	0		1.87393e+136	1.87393e-14	150	3.27989e-15	-112	5.71338	262	5.71338e+262		5.71338e+262	5.71338	5.71338e+262	262	15	0.00983989	0.0190138	49.5	0	0
151	5.3405e-132		5.3405e-132	5.3405e-132	1	5.3405e-132	1	0	0	0		1.51788e+137	1.51788e-14	151	1.75941e-15	-113	8.62721	264	8.62721e+264		8.62721e+264	862.721	8.62721e+264	262	15.1	0.00921846	0.0177218	49.5	2.65088e-23	0
152	2.84593e-133		2.84593e-133	2.84593e-133	1	2.84593e-133	1	0	0	0		1.22948e+138	1.22948e-14	152	9.37581e-15	-115	1.31134	267	1.31134e+267		1.31134e+267	131134	1.31134e+267	262	15.2	0.00863074	0.0165083	50.5	2.65088e-23	0
153	1.50667e-134		1.50667e-134	1.50667e-134	1	1.50667e-134	1	0	0	0		9.95882e+138	9.95882e-15	153	4.96367e-15	-116	2.00634	269	2.00634e+269		2.00634e+269	2.00634e+07	2.00634e+269	262	15.3	0.00807535	0.0153692	50.5	0	0
154	7.92468e-136		7.92468e-136	7.92468e-136	1	7.92468e-136	1	0	0	0		8.06664e+139	8.06664e-15	154	2.61076e-15	-117	3.08977	271	3.08977e+271		3.08977e+271	3.08977e+09	3.08977e+271	262	15.4	0.00755092	0.0143007	50.5	4.21023e-24	0
155	4.14128e-137		4.14128e-137	4.14128e-137	1	4.14128e-137	1	0	0	0		6.53398e+140	6.53398e-15	155	1.36433e-15	-118	4.78914	273	4.78914e+273		4.78914e+273	4.78914e+11	4.78914e+273	262	15.5	0.00705611	0.0132991	51.5	4.21023e-24	0
156	2.15028e-138		2.15028e-138	2.15028e-138	1	2.15028e-138	1	0	0	0		5.29253e+141	5.29253e-15	156	7.08403e-16	-119	7.47106	275	7.47106e+275		7.47106e+275	74710629262829	7.47106e+275	262	15.6	0.0065896	0.0123608	51.5	0	0
157	1.10938e-139		1.10938e-139	1.10938e-139	1	1.10938e-139	1	0	0	0		4.28695e+142	4.28695e-15	157	3.65482e-15	-121	1.17296	278	1.17296e+278		1.17296e+278	1.17296e+16	1.17296e+278	262	15.7	0.00615012	0.0114823	51.5	6.55824e-25	0
158	5.68733e-141		5.68733e-141	5.68733e-141	1	5.68733e-141	1	0	0	0		3.47243e+143	3.47243e-15	158	1.87367e-15	-122	1.85327	280	1.85327e+280		1.85327e+280	1.85327e+18	1.85327e+280	262	15.8	0.00573641	0.0106605	52.5	6.55824e-25	0
159	2.89732e-142		2.89732e-142	2.89732e-142	1	2.89732e-142	1	0	0	0		2.81266e+144	2.81266e-15	159	9.54513e-16	-123	2.9467	282	2.9467e+282		2.9467e+282	2.9467e+20	2.9467e+282	262	15.9	0.00534725	0.00989198	52.5	0	0
160	1.46677e-143		1.46677e-143	1.46677e-143	1	1.46677e-143	1	0	0	0		2.27826e+145	2.27826e-15	160	4.83222e-16	-124	4.71472	284	4.71472e+284		4.71472e+284	4.71472e+22	4.71472e+284	262	16	0.00498145	0.0091739	52.5	1.0023e-25	0
161	7.37939e-145		7.37939e-145	7.37939e-145	1	7.37939e-145	1	0	0	0		1.84539e+146	1.84539e-15	161	2.43112e-16	-125	7.59071	286	7.59071e+286		7.59071e+286	7.59071e+24	7.59071e+286	262	16.1	0.00463786	0.00850333	53.5	1.0023e-25	0
162	3.6897e-146		3.6897e-146	3.6897e-146	1	3.6897e-146	1	0	0	0		1.49477e+147	1.49477e-15	162	1.21556e-15	-127	1.22969	289	1.22969e+289		1.22969e+289	1.22969e+27	1.22969e+289	262	16.2	0.00431537	0.00787752	53.5	0	0
163	1.83353e-147		1.83353e-147	1.83353e-147	1	1.83353e-147	1	0	0	0		1.21076e+148	1.21076e-15	163	6.04051e-16	-128	2.0044	291	2.0044e+291		2.0044e+291	2.0044e+29	2.0044e+291	262	16.3	0.0040129	0.00729384	53.5	1.50345e-26	0
164	9.05585e-149		9.05585e-149	9.05585e-149	1	9.05585e-149	1	0	0	0		9.80716e+148	9.80716e-16	164	2.98342e-16	-129	3.28722	293	3.28722e+293		3.28722e+293	3.28722e+31	3.28722e+293	262	16.4	0.00372942	0.0067498	54.5	1.50345e-26	0
165	4.4456e-150		4.4456e-150	4.4456e-150	1	4.4456e-150	1	0	0	0		7.9438e+149	7.9438e-16	165	1.46459e-16	-130	5.42391	295	5.42391e+295		5.42391e+295	5.42391e+33	5.42391e+295	262	16.5	0.00346391	0.006243	54.5	0	0
166	2.16924e-151		2.16924e-151	2.16924e-151	1	2.16924e-151	1	0	0	0		6.43448e+150	6.43448e-16	166	7.14649e-17	-131	9.00369	297	9.00369e+297		9.00369e+297	9.00369e+35	9.00369e+297	262	16.6	0.00321541	0.00577119	54.5	2.21417e-27	0
167	1.05215e-152		1.05215e-152	1.05215e-152	1	1.05215e-152	1	0	0	0		5.21192e+151	5.21192e-16	167	3.46626e-16	-133	1.50362	300	1.50362e+300		1.50362e+300	1.50362e+38	1.50362e+300	262	16.7	0.00298299	0.00533222	55.5	2.21417e-27	0
168	5.07284e-154		5.07284e-154	5.07284e-154	1	5.07284e-154	1	0	0	0		4.22166e+152	4.22166e-16	168	1.67123e-16	-134	2.52608	302	2.52608e+302		2.52608e+302	2.52608e+40	2.52608e+302	262	16.8	0.00276577	0.00492405	55.5	0	0
169	2.43136e-155		2.43136e-155	2.43136e-155	1	2.43136e-155	1	0	0	0		3.41954e+153	3.41954e-16	169	8.01005e-17	-135	4.26907	304	4.26907e+304		4.26907e+304	4.26907e+42	4.26907e+304	262	16.9	0.00256288	0.00454474	55.5	3.20263e-28	0
170	1.15847e-156		1.15847e-156	1.15847e-156	1	1.15847e-156	1	0	0	0		2.76983e+154	2.76983e-16	170	3.81655e-17	-136	7.25742	306	7.25742e+306		7.25742e+306	7.25742e+44	7.25742e+306	262	17	0.00237351	0.00419246	56.5	3.20263e-28	0
171	#NUM!		5.4875e-158	5.4875e-158	1	5.4875e-158	1	0	0	0		2.24356e+155	2.24356e-16	171	1.80784e-16	-138	1.24102	309	#NUM!		#NUM!	1.24102e+47	#NUM!	262	17.1	0.00219688	0.00386547	56.5	0	0
172	#NUM!		2.58423e-159	2.58423e-159	1	2.58423e-159	1	0	0	0		1.81729e+156	1.81729e-16	172	8.51367e-17	-139	2.13455	311			#NUM!	2.13455e+49	#NUM!	262	17.2	0.00203224	0.00356215	56.5	4.55111e-29	0
173	#NUM!		1.20996e-160	1.20996e-160	1	1.20996e-160	1	0	0	0		1.472e+157	1.472e-16	173	3.98617e-17	-140	3.69277	313			#NUM!	3.69277e+51	#NUM!	262	17.3	0.00187887	0.00328094	57.5	4.55111e-29	0
174	#NUM!		5.63256e-162	5.63256e-162	1	5.63256e-162	1	0	0	0		1.19232e+158	1.19232e-16	174	1.85563e-17	-141	6.42543	315			#NUM!	6.42543e+53	#NUM!	262	17.4	0.00173611	0.00302038	57.5	0	0
175	#NUM!		2.60707e-163	2.60707e-163	1	2.60707e-163	1	0	0	0		9.6578e+158	9.6578e-17	175	8.58892e-17	-143	1.12445	318			#NUM!	1.12445e+56	#NUM!	262	17.5	0.00160329	0.00277909	57.5	6.35586e-30	0
176	#NUM!		1.19985e-164	1.19985e-164	1	1.19985e-164	1	0	0	0		7.82282e+159	7.82282e-17	176	3.95285e-17	-144	1.97903	320			#NUM!	1.97903e+58		262	17.6	0.00147982	0.00255578	58.5	6.35586e-30	0
177	#NUM!		5.49082e-166	5.49082e-166	1	5.49082e-166	1	0	0	0		6.33648e+160	6.33648e-17	177	1.80893e-17	-145	3.50289	322			#NUM!	3.50289e+60		262	17.7	0.0013651	0.00234923	58.5	0	0
178	#NUM!		2.49863e-167	2.49863e-167	1	2.49863e-167	1	0	0	0		5.13255e+161	5.13255e-17	178	8.23166e-18	-146	6.23514	324			#NUM!	6.23514e+62		262	17.8	0.00125858	0.00215828	58.5	8.72584e-31	0
179	#NUM!		1.13067e-168	1.13067e-168	1	1.13067e-168	1	0	0	0		4.15737e+162	4.15737e-17	179	3.72494e-17	-148	1.11609	327			#NUM!	1.11609e+65		262	17.9	0.00115974	0.00198185	59.5	8.72584e-31	0
180	#NUM!		5.08799e-170	5.08799e-170	1	5.08799e-170	1	0	0	0		3.36747e+163	3.36747e-17	180	1.67622e-17	-149	2.00896	329			#NUM!	2.00896e+67		262	18	0.00106808	0.00181894	59.5	0	0
181	#NUM!		2.27695e-171	2.27695e-171	1	2.27695e-171	1	0	0	0		2.72765e+164	2.72765e-17	181	7.50133e-18	-150	3.63622	331			#NUM!	3.63622e+69		262	18.1	0.000983134	0.00166859	59.5	1.17799e-31	0
182	#NUM!		1.01337e-172	1.01337e-172	1	1.01337e-172	1	0	0	0		2.2094e+165	2.2094e-17	182	3.33851e-18	-151	6.61792	333			#NUM!	6.61792e+71		262	18.2	0.000904458	0.00152991	60.5	1.17799e-31	0
183	#NUM!		4.48539e-174	4.48539e-174	1	4.48539e-174	1	0	0	0		1.78961e+166	1.78961e-17	183	1.4777e-17	-153	1.21108	336			#NUM!	1.21108e+74		262	18.3	0.000831633	0.00140207	60.5	0	0
184	#NUM!		1.97455e-175	1.97455e-175	1	1.97455e-175	1	0	0	0		1.44958e+167	1.44958e-17	184	6.50509e-18	-154	2.22839	338			#NUM!	2.22839e+76		262	18.4	0.000764265	0.00128427	60.5	1.56421e-32	0
185	#NUM!		8.64532e-177	8.64532e-177	1	8.64532e-177	1	0	0	0		1.17416e+168	1.17416e-17	185	2.84817e-18	-155	4.12251	340			#NUM!	4.12251e+78		262	18.5	0.000701983	0.0011758	61.5	1.56421e-32	0
186	#NUM!		3.7649e-178	3.7649e-178	1	3.7649e-178	1	0	0	0		9.51072e+168	9.51072e-18	186	1.24033e-18	-156	7.66787	342			#NUM!	7.66787e+80		262	18.6	0.000644437	0.00107596	61.5	0	0
187	#NUM!		1.63078e-179	1.63078e-179	1	1.63078e-179	1	0	0	0		7.70369e+169	7.70369e-18	187	5.37257e-18	-158	1.43389	345			#NUM!	1.43389e+83		262	18.7	0.000591299	0.00098413	61.5	2.04357e-33	0
188	#NUM!		7.02625e-181	7.02625e-181	1	7.02625e-181	1	0	0	0		6.23999e+170	6.23999e-18	188	2.31478e-18	-159	2.69572	347			#NUM!	2.69572e+85		262	18.8	0.000542261	0.000899698	62.5	2.04357e-33	0
189	#NUM!		3.01125e-182	3.01125e-182	1	3.01125e-182	1	0	0	0		5.05439e+171	5.05439e-18	189	9.92047e-19	-160	5.09491	349			#NUM!	5.09491e+87		262	18.9	0.000497031	0.000822115	62.5	0	0
190	#NUM!		1.28374e-183	1.28374e-183	1	1.28374e-183	1	0	0	0		4.09405e+172	4.09405e-18	190	4.22925e-19	-161	9.68032	351			#NUM!	9.68032e+89		262	19	0.00045534	0.000750862	62.5	2.62745e-34	0
191	#NUM!		5.44415e-185	5.44415e-185	1	5.44415e-185	1	0	0	0		3.31618e+173	3.31618e-18	191	1.79356e-18	-163	1.84894	354			#NUM!	1.84894e+92		262	19.1	0.000416931	0.000685458	63.5	2.62745e-34	0
192	#NUM!		2.29675e-186	2.29675e-186	1	2.29675e-186	1	0	0	0		2.68611e+174	2.68611e-18	192	7.56657e-19	-164	3.54997	356			#NUM!	3.54997e+94		262	19.2	0.000381568	0.000625454	63.5	0	0
193	#NUM!		9.63921e-188	9.63921e-188	1	9.63921e-188	1	0	0	0		2.17575e+175	2.17575e-18	193	3.17561e-19	-165	6.85144	358			#NUM!	6.85144e+96		262	19.3	0.000349027	0.000570433	63.5	3.32536e-35	0
194	#NUM!		4.02462e-189	4.02462e-189	1	4.02462e-189	1	0	0	0		1.76236e+176	1.76236e-18	194	1.3259e-18	-167	1.32918	361			#NUM!	1.32918e+99		262	19.4	0.0003191	0.000520007	64.5	3.32536e-35	0
195	#NUM!		1.67177e-190	1.67177e-190	1	1.67177e-190	1	0	0	0		1.42751e+177	1.42751e-18	195	5.50758e-19	-168	2.5919	363			#NUM!	2.5919e+101		262	19.5	0.000291593	0.000473817	64.5	0	0
196	#NUM!		6.90883e-192	6.90883e-192	1	6.90883e-192	1	0	0	0		1.15628e+178	1.15628e-18	196	2.27609e-19	-169	5.08012	365			#NUM!	5.08012e+103		262	19.6	0.000266324	0.000431528	64.5	4.14391e-36	0
197	#NUM!		2.84068e-193	2.84068e-193	1	2.84068e-193	1	0	0	0		9.36588e+178	9.36588e-19	197	9.35855e-19	-171	1.00078	368			#NUM!	1.00078e+106		262	19.7	0.000243123	0.00039283	65.5	4.14391e-36	0
198	#NUM!		1.1621e-194	1.1621e-194	1	1.1621e-194	1	0	0	0		7.58637e+179	7.58637e-19	198	3.8285e-19	-172	1.98155	370			#NUM!	1.98155e+108		262	19.8	0.000221834	0.000357438	65.5	0	0
199	#NUM!		4.73015e-196	4.73015e-196	1	4.73015e-196	1	0	0	0		6.14496e+180	6.14496e-19	199	1.55833e-19	-173	3.94329	372			#NUM!	3.94329e+110		262	19.9	0.000202309	0.000325084	65.5	5.08571e-37	0
200	#NUM!		1.91571e-197	1.91571e-197	1	1.91571e-197	1	0	0	0		4.97741e+181	4.97741e-19	200	6.31125e-20	-174	7.88658	374			#NUM!	7.88658e+112		262	20	0.000184413	0.000295523	66.5	5.08571e-37	0
201	#NUM!		7.72003e-199	7.72003e-199	1	7.72003e-199	1	0	0	0		4.03171e+182	4.03171e-19	201	2.54334e-19	-176	1.5852	377			#NUM!	1.5852e+115		262	20.1	0.000168017	0.000268527	66.5	0	0
202	#NUM!		3.09565e-200	3.09565e-200	1	3.09565e-200	1	0	0	0		3.26568e+183	3.26568e-19	202	1.01985e-19	-177	3.20211	379			#NUM!	3.20211e+117		262	20.2	0.000153005	0.000243886	66.5	6.1484e-38	0
203	#NUM!		1.23521e-201	1.23521e-201	1	1.23521e-201	1	0	0	0		2.6452e+184	2.6452e-19	203	4.06937e-20	-178	6.50028	381			#NUM!	6.50028e+119		262	20.3	0.000139267	0.000221406	67.5	6.1484e-38	0
204	#NUM!		4.90452e-203	4.90452e-203	1	4.90452e-203	1	0	0	0		2.14261e+185	2.14261e-19	204	1.61578e-19	-180	1.32606	384			#NUM!	1.32606e+122		262	20.4	0.000126702	0.000200907	67.5	0	0
205	#NUM!		1.93788e-204	1.93788e-204	1	1.93788e-204	1	0	0	0		1.73552e+186	1.73552e-19	205	6.38429e-20	-181	2.71842	386			#NUM!	2.71842e+124		262	20.5	0.000115215	0.000182224	67.5	7.32383e-39	0
206	#NUM!		7.61983e-206	7.61983e-206	1	7.61983e-206	1	0	0	0		1.40577e+187	1.40577e-19	206	2.51033e-20	-182	5.59994	388			#NUM!	5.59994e+126		262	20.6	0.000104719	0.000165204	68.5	7.32383e-39	0
207	#NUM!		2.98167e-207	2.98167e-207	1	2.98167e-207	1	0	0	0		1.13867e+188	1.13867e-19	207	9.82302e-20	-184	1.15919	391			#NUM!	1.15919e+129		262	20.7	9.51351e-05	0.000149707	68.5	0	0
208	#NUM!		1.16113e-208	1.16113e-208	1	1.16113e-208	1	0	0	0		9.22325e+188	9.22325e-20	208	3.82531e-20	-185	2.41111	393			#NUM!	2.41111e+131		262	20.8	8.63872e-05	0.000135604	68.5	8.59754e-40	0
209	#NUM!		4.50008e-210	4.50008e-210	1	4.50008e-210	1	0	0	0		7.47083e+189	7.47083e-20	209	1.48254e-20	-186	5.03922	395			#NUM!	5.03922e+133		262	20.9	7.84069e-05	0.000122775	69.5	8.59754e-40	0
210	#NUM!		1.73575e-211	1.73575e-211	1	1.73575e-211	1	0	0	0		6.05137e+190	6.05137e-20	210	5.71836e-20	-188	1.05824	398			#NUM!	1.05824e+136		262	21	7.11306e-05	0.00011111	69.5	0	0
211	#NUM!		6.66329e-213	6.66329e-213	1	6.66329e-213	1	0	0	0		4.90161e+191	4.90161e-20	211	2.1952e-20	-189	2.23288	400			#NUM!	2.23288e+138		262	21.1	6.44995e-05	0.00010051	69.5	9.94858e-41	0
212	#NUM!		2.54588e-214	2.54588e-214	1	2.54588e-214	1	0	0	0		3.97031e+192	3.97031e-20	212	8.38732e-21	-190	4.7337	402			#NUM!	4.7337e+140		262	21.2	5.84595e-05	9.08808e-05	70.5	9.94858e-41	0
213	#NUM!		9.68151e-216	9.68151e-216	1	9.68151e-216	1	0	0	0		3.21595e+193	3.21595e-20	213	3.18954e-20	-192	1.00828	405			#NUM!	1.00828e+143		262	21.3	5.29607e-05	8.21386e-05	70.5	0	0
214	#NUM!		3.6645e-217	3.6645e-217	1	3.6645e-217	1	0	0	0		2.60492e+194	2.60492e-20	214	1.20726e-20	-193	2.15772	407			#NUM!	2.15772e+145		262	21.4	4.79572e-05	7.42051e-05	70.5	1.13498e-41	0
215	#NUM!		1.38058e-218	1.38058e-218	1	1.38058e-218	1	0	0	0		2.10998e+195	2.10998e-20	215	4.54827e-21	-194	4.63909	409			#NUM!	4.63909e+147		262	21.5	4.34065e-05	6.7009e-05	71.5	1.13498e-41	0
216	#NUM!		5.17717e-220	5.17717e-220	1	5.17717e-220	1	0	0	0		1.70909e+196	1.70909e-20	216	1.7056e-20	-196	1.00204	412			#NUM!	1.00204e+150		262	21.6	3.92698e-05	6.04846e-05	71.5	0	0
217	#NUM!		1.93249e-221	1.93249e-221	1	1.93249e-221	1	0	0	0		1.38436e+197	1.38436e-20	217	6.36653e-21	-197	2.17443	414			#NUM!	2.17443e+152		262	21.7	3.55113e-05	5.45721e-05	71.5	1.27685e-42	0
218	#NUM!		7.18036e-223	7.18036e-223	1	7.18036e-223	1	0	0	0		1.12133e+198	1.12133e-20	218	2.36555e-21	-198	4.74027	416			#NUM!	4.74027e+154		262	21.8	3.2098e-05	4.92165e-05	72.5	1.27685e-42	0
219	#NUM!		2.65575e-224	2.65575e-224	1	2.65575e-224	1	0	0	0		9.08279e+198	9.08279e-21	219	8.74928e-21	-200	1.03812	419			#NUM!	1.03812e+157		262	21.9	2.89998e-05	4.43676e-05	72.5	0	0
220	#NUM!		9.77798e-226	9.77798e-226	1	9.77798e-226	1	0	0	0		7.35706e+199	7.35706e-21	220	3.22133e-21	-201	2.28386	421			#NUM!	2.28386e+159		262	22	2.6189e-05	3.99795e-05	72.5	1.41678e-43	0
221	#NUM!		3.58379e-227	3.58379e-227	1	3.58379e-227	1	0	0	0		5.95922e+200	5.95922e-21	221	1.18067e-21	-202	5.04733	423			#NUM!	5.04733e+161		262	22.1	2.36401e-05	3.60102e-05	73.5	1.41678e-43	0
222	#NUM!		1.3076e-228	1.3076e-228	1	1.3076e-228	1	0	0	0		4.82697e+201	4.82697e-21	222	4.30784e-21	-204	1.12051	426			#NUM!	1.12051e+164		262	22.2	2.13298e-05	3.24213e-05	73.5	0	0
223	#NUM!		4.74957e-230	4.74957e-230	1	4.74957e-230	1	0	0	0		3.90984e+202	3.90984e-21	223	1.56473e-21	-205	2.49873	428			#NUM!	2.49873e+166		262	22.3	1.92368e-05	2.91779e-05	73.5	1.5508e-44	0
224	#NUM!		1.71748e-231	1.71748e-231	1	1.71748e-231	1	0	0	0		3.16697e+203	3.16697e-21	224	5.65818e-22	-206	5.59716	430			#NUM!	5.59716e+168		262	22.4	1.73416e-05	2.6248e-05	74.5	1.5508e-44	0
225	#NUM!		6.18292e-233	6.18292e-233	1	6.18292e-233	1	0	0	0		2.56525e+204	2.56525e-21	225	2.03694e-21	-208	1.25936	433			#NUM!	1.25936e+171		262	22.5	1.56263e-05	2.36025e-05	74.5	0	0
226	#NUM!		2.216e-234	2.216e-234	1	2.216e-234	1	0	0	0		2.07785e+205	2.07785e-21	226	7.30055e-22	-209	2.84616	435			#NUM!	2.84616e+173		262	22.6	1.40746e-05	2.12148e-05	74.5	1.67486e-45	0
227	#NUM!		7.90732e-236	7.90732e-236	1	7.90732e-236	1	0	0	0		1.68306e+206	1.68306e-21	227	2.60504e-22	-210	6.46077	437			#NUM!	6.46077e+175		262	22.7	1.26714e-05	1.90608e-05	75.5	1.67486e-45	0
228	#NUM!		2.80918e-237	2.80918e-237	1	2.80918e-237	1	0	0	0		1.36328e+207	1.36328e-21	228	9.25476e-22	-212	1.47306	440			#NUM!	1.47306e+178		262	22.8	1.14032e-05	1.71185e-05	75.5	0	0
229	#NUM!		9.9364e-239	9.9364e-239	1	9.9364e-239	1	0	0	0		1.10425e+208	1.10425e-21	229	3.27352e-22	-213	3.3733	442			#NUM!	3.3733e+180		262	22.9	1.02576e-05	1.53678e-05	75.5	1.78505e-46	0
230	#NUM!		3.49934e-240	3.49934e-240	1	3.49934e-240	1	0	0	0		8.94446e+208	8.94446e-22	230	1.15285e-22	-214	7.75859	444			#NUM!	7.75859e+182		262	23	9.22307e-06	1.37905e-05	76.5	1.78505e-46	0
231	#NUM!		1.22704e-241	1.22704e-241	1	1.22704e-241	1	0	0	0		7.24502e+209	7.24502e-22	231	4.04245e-22	-216	1.79223	447			#NUM!	1.79223e+185		262	23.1	8.28938e-06	1.23701e-05	76.5	0	0
232	#NUM!		4.28407e-243	4.28407e-243	1	4.28407e-243	1	0	0	0		5.86846e+210	5.86846e-22	232	1.41137e-22	-217	4.15798	449			#NUM!	4.15798e+187		262	23.2	7.44705e-06	1.10915e-05	76.5	1.87778e-47	0
233	#NUM!		1.48931e-244	1.48931e-244	1	1.48931e-244	1	0	0	0		4.75346e+211	4.75346e-22	233	4.90649e-23	-218	9.6881	451			#NUM!	9.6881e+189		262	23.3	6.68749e-06	9.94104e-06	77.5	1.87778e-47	0
234	#NUM!		5.15531e-246	5.15531e-246	1	5.15531e-246	1	0	0	0		3.8503e+212	3.8503e-22	234	1.6984e-22	-220	2.26702	454			#NUM!	2.26702e+192		262	23.4	6.00288e-06	8.90633e-06	77.5	0	0
235	#NUM!		1.77694e-247	1.77694e-247	1	1.77694e-247	1	0	0	0		3.11874e+213	3.11874e-22	235	5.85406e-23	-221	5.32749	456			#NUM!	5.32749e+194		262	23.5	5.3861e-06	7.97613e-06	77.5	1.95e-48	0
236	#NUM!		6.09881e-249	6.09881e-249	1	6.09881e-249	1	0	0	0		2.52618e+214	2.52618e-22	236	2.00923e-22	-223	1.25729	459			#NUM!	1.25729e+197		262	23.6	4.83068e-06	7.14023e-06	78.5	1.95e-48	0
237	#NUM!		2.0844e-250	2.0844e-250	1	2.0844e-250	1	0	0	0		2.04621e+215	2.04621e-22	237	6.867e-23	-224	2.97977	461			#NUM!	2.97977e+199		262	23.7	4.33074e-06	6.3894e-06	78.5	0	0
238	#NUM!		7.09397e-252	7.09397e-252	1	7.09397e-252	1	0	0	0		1.65743e+216	1.65743e-22	238	2.33709e-23	-225	7.09185	463			#NUM!	7.09185e+201		262	23.8	3.88093e-06	5.71525e-06	78.5	1.99937e-49	0
239	#NUM!		2.40423e-253	2.40423e-253	1	2.40423e-253	1	0	0	0		1.34252e+217	1.34252e-22	239	7.92067e-23	-227	1.69495	466			#NUM!	1.69495e+204		262	23.9	3.47642e-06	5.11022e-06	79.5	1.99937e-49	0
240	#NUM!		8.11429e-255	8.11429e-255	1	8.11429e-255	1	0	0	0		1.08744e+218	1.08744e-22	240	2.67323e-23	-228	4.06789	468			#NUM!	4.06789e+206		262	24	3.11279e-06	4.56745e-06	79.5	0	0
241	#NUM!		2.72721e-256	2.72721e-256	1	2.72721e-256	1	0	0	0		8.80825e+218	8.80825e-23	241	8.9847e-24	-229	9.8036	470			#NUM!	9.8036e+208		262	24.1	2.78606e-06	4.08073e-06	79.5	2.02436e-50	0
242	#NUM!		9.12826e-258	9.12826e-258	1	9.12826e-258	1	0	0	0		7.13468e+219	7.13468e-23	242	3.00728e-23	-231	2.37247	473			#NUM!	2.37247e+211		262	24.2	2.49261e-06	3.64445e-06	80.5	2.02436e-50	0
243	#NUM!		3.04275e-259	3.04275e-259	1	3.04275e-259	1	0	0	0		5.77909e+220	5.77909e-23	243	1.00243e-23	-232	5.76511	475			#NUM!	5.76511e+213		262	24.3	2.22916e-06	3.25355e-06	80.5	0	0
244	#NUM!		1.01009e-260	1.01009e-260	1	1.01009e-260	1	0	0	0		4.68106e+221	4.68106e-23	244	3.32772e-23	-234	1.40669	478			#NUM!	1.40669e+216		262	24.4	1.99276e-06	2.90345e-06	80.5	2.02436e-51	0
245	#NUM!		3.3395e-262	3.3395e-262	1	3.3395e-262	1	0	0	0		3.79166e+222	3.79166e-23	245	1.10019e-23	-235	3.44638	480			#NUM!	3.44638e+218		262	24.5	1.78071e-06	2.59003e-06	81.5	2.02436e-51	0
246	#NUM!		1.09959e-263	1.09959e-263	1	1.09959e-263	1	0	0	0		3.07125e+223	3.07125e-23	246	3.62257e-24	-236	8.4781	482			#NUM!	8.4781e+220		262	24.6	1.59059e-06	2.30955e-06	81.5	0	0
247	#NUM!		3.60594e-265	3.60594e-265	1	3.60594e-265	1	0	0	0		2.48771e+224	2.48771e-23	247	1.18797e-23	-238	2.09409	485			#NUM!	2.09409e+223		262	24.7	1.4202e-06	2.05866e-06	81.5	1.99968e-52	0
248	#NUM!		1.17775e-266	1.17775e-266	1	1.17775e-266	1	0	0	0		2.01504e+225	2.01504e-23	248	3.88005e-24	-239	5.19334	487			#NUM!	5.19334e+225		262	24.8	1.26756e-06	1.83432e-06	82.5	1.99968e-52	0
249	#NUM!		3.83123e-268	3.83123e-268	1	3.83123e-268	1	0	0	0		1.63219e+226	1.63219e-23	249	1.26219e-23	-241	1.29314	490			#NUM!	1.29314e+228		262	24.9	1.13088e-06	1.63381e-06	82.5	0	0
250	#NUM!		1.24132e-269	1.24132e-269	1	1.24132e-269	1	0	0	0		1.32207e+227	1.32207e-23	250	4.08948e-24	-242	3.23286	492			#NUM!	3.23286e+230		262	25	1.00854e-06	1.45466e-06	82.5	1.95149e-53	0
251	#NUM!		4.00585e-271	4.00585e-271	1	4.00585e-271	1	0	0	0		1.07088e+228	1.07088e-23	251	1.31971e-24	-243	8.11447	494			#NUM!	8.11447e+232		262	25.1	8.99086e-07	1.29467e-06	83.5	1.95149e-53	0
252	#NUM!		1.28759e-272	1.28759e-272	1	1.28759e-272	1	0	0	0		8.67411e+228	8.67411e-24	252	4.24194e-24	-245	2.04485	497			#NUM!	2.04485e+235		262	25.2	8.01195e-07	1.15184e-06	83.5	0	0
253	#NUM!		4.12234e-274	4.12234e-274	1	4.12234e-274	1	0	0	0		7.02603e+229	7.02603e-24	253	1.35809e-24	-246	5.17346	499			#NUM!	5.17346e+237		262	25.3	7.13685e-07	1.02439e-06	83.5	1.88179e-54	0
254	#NUM!		1.3146e-275	1.3146e-275	1	1.3146e-275	1	0	0	0		5.69108e+230	5.69108e-24	254	4.33092e-24	-248	1.31406	502			#NUM!	1.31406e+240		262	25.4	6.35486e-07	9.10694e-07	84.5	1.88179e-54	0
255	#NUM!		4.1758e-277	4.1758e-277	1	4.1758e-277	1	0	0	0		4.60978e+231	4.60978e-24	255	1.3757e-24	-249	3.35085	504			#NUM!	3.35085e+242		262	25.5	5.65637e-07	8.09318e-07	84.5	0	0
256	#NUM!		1.32125e-278	1.32125e-278	1	1.32125e-278	1	0	0	0		3.73392e+232	3.73392e-24	256	4.35281e-25	-250	8.57818	506			#NUM!	8.57818e+244		262	25.6	5.03273e-07	7.18961e-07	84.5	1.79324e-55	0
257	#NUM!		4.16425e-280	4.16425e-280	1	4.16425e-280	1	0	0	0		3.02447e+233	3.02447e-24	257	1.3719e-24	-252	2.20459	509			#NUM!	2.20459e+247		262	25.7	4.47612e-07	6.38456e-07	85.5	1.79324e-55	0
258	#NUM!		1.30738e-281	1.30738e-281	1	1.30738e-281	1	0	0	0		2.44982e+234	2.44982e-24	258	4.30712e-25	-253	5.68785	511			#NUM!	5.68785e+249		262	25.8	3.97956e-07	5.66756e-07	85.5	0	0
259	#NUM!		4.08872e-283	4.08872e-283	1	4.08872e-283	1	0	0	0		1.98436e+235	1.98436e-24	259	1.34701e-24	-255	1.47315	514			#NUM!	1.47315e+252		262	25.9	3.53674e-07	5.02924e-07	85.5	1.68898e-56	0
260	#NUM!		1.27379e-284	1.27379e-284	1	1.27379e-284	1	0	0	0		1.60733e+236	1.60733e-24	260	4.19647e-25	-256	3.8302	516			#NUM!	3.8302e+254		262	26	3.142e-07	4.46118e-07	86.5	1.68898e-56	0
261	#NUM!		3.95315e-286	3.95315e-286	1	3.95315e-286	1	0	0	0		1.30194e+237	1.30194e-24	261	1.30235e-25	-257	9.99681	518			#NUM!	9.99681e+256		262	26.1	2.79027e-07	3.95584e-07	86.5	0	0
262	#NUM!		1.22216e-287	1.22216e-287	1	1.22216e-287	1	0	0	0		1.05457e+238	1.05457e-24	262	4.02636e-25	-259	2.61916	521			#NUM!	2.61916e+259		262	26.2	2.47698e-07	3.50646e-07	86.5	1.5725e-57	0
263	#NUM!		3.76406e-289	3.76406e-289	1	3.76406e-289	1	0	0	0		8.54201e+238	8.54201e-25	263	1.24006e-25	-260	6.8884	523			#NUM!	6.8884e+261		262	26.3	2.19804e-07	3.10701e-07	87.5	1.5725e-57	0
264	#NUM!		1.15488e-290	1.15488e-290	1	1.15488e-290	1	0	0	0		6.91903e+239	6.91903e-25	264	3.80472e-25	-262	1.81854	526			#NUM!	1.81854e+264		262	26.4	1.94979e-07	2.75208e-07	87.5	0	0
265	#NUM!		3.53001e-292	3.53001e-292	1	3.53001e-292	1	0	0	0		5.60441e+240	5.60441e-25	265	1.16295e-25	-263	4.81913	528			#NUM!	4.81913e+266		262	26.5	1.72893e-07	2.43681e-07	87.5	1.44742e-58	0
266	#NUM!		1.07493e-293	1.07493e-293	1	1.07493e-293	1	0	0	0		4.53957e+241	4.53957e-25	266	3.54132e-25	-265	1.28189	531			#NUM!	1.28189e+269		262	26.6	1.53252e-07	2.15689e-07	88.5	1.44742e-58	0
267	#NUM!		3.26102e-295	3.26102e-295	1	3.26102e-295	1	0	0	0		3.67705e+242	3.67705e-25	267	1.07433e-25	-266	3.42264	533			#NUM!	3.42264e+271		262	26.7	1.35792e-07	1.90844e-07	88.5	0	0
268	#NUM!		9.85607e-297	9.85607e-297	1	9.85607e-297	1	0	0	0		2.97841e+243	2.97841e-25	268	3.24705e-26	-267	9.17268	535			#NUM!	9.17268e+273		262	26.8	1.20278e-07	1.688e-07	88.5	1.31731e-59	0
269	#NUM!		2.96781e-298	2.96781e-298	1	2.96781e-298	1	0	0	0		2.41252e+244	2.41252e-25	269	9.77736e-26	-269	2.46745	538			#NUM!	2.46745e+276		262	26.9	1.06497e-07	1.4925e-07	89.5	1.31731e-59	0
270	#NUM!		8.90344e-300	8.90344e-300	1	8.90344e-300	1	0	0	0		1.95414e+245	1.95414e-25	270	2.93321e-26	-270	6.66211	540			#NUM!	6.66211e+278		262	27	9.426e-08	1.31918e-07	89.5	0	0
271	#NUM!		2.66118e-301	2.66118e-301	1	2.66118e-301	1	0	0	0		1.58285e+246	1.58285e-25	271	8.76716e-26	-272	1.80543	543			#NUM!	1.80543e+281		262	27.1	8.33991e-08	1.16557e-07	89.5	1.18558e-60	0
272	#NUM!		7.92482e-303	7.92482e-303	1	7.92482e-303	1	0	0	0		1.28211e+247	1.28211e-25	272	2.61081e-26	-273	4.91078	545			#NUM!	4.91078e+283		262	27.2	7.37629e-08	1.02949e-07	90.5	1.18558e-60	0
273	#NUM!		2.35132e-304	2.35132e-304	1	2.35132e-304	1	0	0	0		1.03851e+248	1.03851e-25	273	7.74635e-26	-275	1.34064	548			#NUM!	1.34064e+286		262	27.3	6.52166e-08	9.08975e-08	90.5	0	0
274	#NUM!		6.95099e-306	6.95099e-306	1	6.95099e-306	1	0	0	0		8.41192e+248	8.41192e-26	274	2.28998e-26	-276	3.67336	550			#NUM!	3.67336e+288		262	27.4	5.76397e-08	8.0229e-08	90.5	1.0553e-61	0
275	#NUM!		2.04738e-307	2.04738e-307	1	0	1	0	0	0		6.81366e+249	6.81366e-26	275	6.74503e-26	-278	1.01017	553			#NUM!	1.01017e+291		262	27.5	5.09248e-08	7.0788e-08	91.5	1.0553e-61	0
276	#NUM!		0	0	1	0	1	0	0	0		5.51906e+250	5.51906e-26	276	1.97952e-26	-279	2.78808	555			#NUM!	2.78808e+293		262	27.6	4.49762e-08	6.24364e-08	91.5	0	0
277	#NUM!		0	0	1	0	1	0	0	0		4.47044e+251	4.47044e-26	277	5.78849e-27	-280	7.72298	557			#NUM!	7.72298e+295		262	27.7	3.97083e-08	5.5051e-08	91.5	9.29119e-63	0
278	#NUM!		0	0	1	0	1	0	0	0		3.62106e+252	3.62106e-26	278	1.68657e-26	-282	2.14699	560			#NUM!	2.14699e+298		262	27.8	3.50449e-08	4.85226e-08	92.5	9.29119e-63	0
279	#NUM!		0	0	1	0	1	0	0	0		2.93306e+253	2.93306e-26	279	4.89651e-27	-283	5.9901	562			#NUM!	5.9901		562	27.9	3.09184e-08	4.27537e-08	92.5	0	0
280	#NUM!		0	0	1	0	1	0	0	0		2.37577e+254	2.37577e-26	280	1.41649e-26	-285	1.67723	565			#NUM!	1677.23		562	28	2.72681e-08	3.76577e-08	92.5	8.09233e-64	0
281	#NUM!		0	0	1	0	1	0	0	0		1.92438e+255	1.92438e-26	281	4.08312e-27	-286	4.71301	567			#NUM!	471301		562	28.1	2.40403e-08	3.31579e-08	93.5	8.09233e-64	0
282	#NUM!		0	0	1	0	1	0	0	0		1.55875e+256	1.55875e-26	282	1.17281e-26	-288	1.32907	570			#NUM!	1.32907e+08		562	28.2	2.11872e-08	2.91859e-08	93.5	0	0
283	#NUM!		0	0	1	0	1	0	0	0		1.26258e+257	1.26258e-26	283	3.35681e-27	-289	3.76126	572			#NUM!	3.76126e+10		562	28.3	1.86662e-08	2.56809e-08	93.5	6.97318e-65	0
284	#NUM!		0	0	1	0	1	0	0	0		1.02269e+258	1.02269e-26	284	9.57399e-27	-291	1.0682	575			#NUM!	1.0682e+13		562	28.4	1.64395e-08	2.25893e-08	94.5	6.97318e-65	0
285	#NUM!		0	0	1	0	1	0	0	0		8.28381e+258	8.28381e-27	285	2.72103e-27	-292	3.04437	577			#NUM!	3.04437e+15		562	28.5	1.44734e-08	1.98632e-08	94.5	0	0
286	#NUM!		0	0	1	0	1	0	0	0		6.70989e+259	6.70989e-27	286	7.70641e-28	-293	8.70689	579			#NUM!	8.70689e+17		562	28.6	1.2738e-08	1.74602e-08	94.5	5.94555e-66	0
287	#NUM!		0	0	1	0	1	0	0	0		5.43501e+260	5.43501e-27	287	2.17498e-27	-295	2.49888	582			#NUM!	2.49888e+20		562	28.7	1.12069e-08	1.53428e-08	95.5	5.94555e-66	0
288	#NUM!		0	0	1	0	1	0	0	0		4.40236e+261	4.40236e-27	288	6.11713e-28	-296	7.19677	584			#NUM!	7.19677e+22		562	28.8	9.85639e-09	1.34776e-08	95.5	0	0
289	#NUM!		0	0	1	0	1	0	0	0		3.56591e+262	3.56591e-27	289	1.71449e-27	-298	2.07987	587			#NUM!	2.07987e+25		562	28.9	8.6657e-09	1.18353e-08	95.5	5.01656e-67	0
290	#NUM!		0	0	1	0	1	0	0	0		2.88839e+263	2.88839e-27	290	4.78875e-28	-299	6.03161	589			#NUM!	6.03161e+27		562	29	7.61625e-09	1.03897e-08	96.5	5.01656e-67	0
291	#NUM!		0	0	1	0	1	0	0	0		2.33959e+264	2.33959e-27	291	1.33295e-27	-301	1.7552	592			#NUM!	1.7552e+30		562	29.1	6.69163e-09	9.1176e-09	96.5	0	0
292	#NUM!		0	0	1	0	1	0	0	0		1.89507e+265	1.89507e-27	292	3.69757e-28	-302	5.12518	594			#NUM!	5.12518e+32		562	29.2	5.87728e-09	7.99865e-09	96.5	4.18908e-68	0
293	#NUM!		0	0	1	0	1	0	0	0		1.53501e+266	1.53501e-27	293	1.02219e-27	-304	1.50168	597			#NUM!	1.50168e+35		562	29.3	5.16029e-09	7.01472e-09	97.5	4.18908e-68	0
294	#NUM!		0	0	1	0	1	0	0	0		1.24336e+267	1.24336e-27	294	2.81625e-28	-305	4.41493	599			#NUM!	4.41493e+37		562	29.4	4.52925e-09	6.14981e-09	97.5	0	0
295	#NUM!		0	0	1	0	1	0	0	0		1.00712e+268	1.00712e-27	295	7.73276e-28	-307	1.30241	602			#NUM!	1.30241e+40		562	29.5	3.97405e-09	5.38979e-09	97.5	3.46241e-69	0
296	#NUM!		0	0	1	0	1	0	0	0		8.15766e+268	8.15766e-28	296	2.11606e-28	-308	3.85512	604			#NUM!	3.85512e+42		562	29.6	3.48574e-09	4.72216e-09	98.5	3.46241e-69	0
297	#NUM!		0	0	1	0	1	0	0	0		6.6077e+269	6.6077e-28	297	5.77107e-28	-310	1.14497	607			#NUM!	1.14497e+45		562	29.7	3.05642e-09	4.13589e-09	98.5	0	0
298	#NUM!		0	0	1	0	1	0	0	0		5.35224e+270	5.35224e-28	298	1.56865e-28	-311	3.41201	609			#NUM!	3.41201e+47		562	29.8	2.67909e-09	3.62124e-09	98.5	2.83288e-70	0
299	#NUM!		0	0	1	0	1	0	0	0		4.33531e+271	4.33531e-28	299	4.24951e-28	-313	1.02019	612			#NUM!	1.02019e+50		562	29.9	2.34756e-09	3.16961e-09	99.5	2.83288e-70	0
300	#NUM!		0	0	1	0	1	0	0	0		3.51161e+272	3.51161e-28	300	1.14737e-28	-314	3.06058	614			#NUM!	3.06058e+52		562	30	2.05639e-09	2.77342e-09	99.5	0	0
301	#NUM!		0	0	1	0	1	0	0	0		2.8444e+273	2.8444e-28	301	3.0876e-29	-315	9.21233	616			#NUM!	9.21233e+54		562	30.1	1.80074e-09	2.42597e-09	99.5	2.29463e-71	0
302	#NUM!		0	0	1	0	1	0	0	0		2.30396e+274	2.30396e-28	302	8.28131e-29	-317	2.78212	619			#NUM!	2.78212e+57		562	30.2	1.57636e-09	2.12137e-09	100.5	2.29463e-71	0
303	#NUM!		0	0	1	0	1	0	0	0		1.86621e+275	1.86621e-28	303	2.21382e-29	-318	8.42984	621			#NUM!	8.42984e+59		562	30.3	1.37948e-09	1.85443e-09	100.5	0	0
304	#NUM!		0	0	1	0	1	0	0	0		1.51163e+276	1.51163e-28	304	5.89866e-29	-320	2.56267	624			#NUM!	2.56267e+62		562	30.4	1.20681e-09	1.62057e-09	100.5	1.84025e-72	0
305	#NUM!		0	0	1	0	1	0	0	0		1.22442e+277	1.22442e-28	305	1.56653e-29	-321	7.81614	626			#NUM!	7.81614e+64		562	30.5	1.0554e-09	1.41575e-09	101.5	1.84025e-72	0
306	#NUM!		0	0	1	0	1	0	0	0		9.91781e+277	9.91781e-29	306	4.14669e-29	-323	2.39174	629			#NUM!	2.39174e+67		562	30.6	9.22696e-10	1.23643e-09	0	0	0
307	#NUM!		0	0	1	0	1	0	0	0		8.03343e+278	8.03343e-29	307	1.09408e-29	-324	7.34264	631			#NUM!	7.34264e+69		562	30.7	8.06416e-10	1.07948e-09
308	#NUM!		0	0	1	0	1	0	0	0		6.50708e+279	6.50708e-29	308	2.87728e-29	-326	2.26153	634			#NUM!	2.26153e+72		562	30.8	7.04565e-10	9.42157e-10
309	#NUM!		0	0	1	0	1	0	0	0		5.27073e+280	5.27073e-29	309	7.5424e-30	-327	6.98814	636			#NUM!	6.98814e+74		562	30.9	6.15381e-10	8.22049e-10
310	#NUM!		0	0	1	0	1	0	0	0		4.26929e+281	4.26929e-29	310	1.97075e-29	-329	2.16632	639			#NUM!	2.16632e+77		562	31	5.37314e-10	7.17029e-10
311	#NUM!		0	0	1	0	1	0	0	0		3.45813e+282	3.45813e-29	311	5.13283e-30	-330	6.73726	641			#NUM!	6.73726e+79		562	31.1	4.69003e-10	6.25232e-10
312	#NUM!		0	0	1	0	1	0	0	0		2.80108e+283	2.80108e-29	312	1.33256e-29	-332	2.10203	644			#NUM!	2.10203e+82		562	31.2	4.09246e-10	5.45018e-10
313	#NUM!		0	0	1	0	1	0	0	0		2.26888e+284	2.26888e-29	313	3.44849e-30	-333	6.57934	646			#NUM!	6.57934e+84		562	31.3	3.56991e-10	4.74949e-10
314	#NUM!		0	0	1	0	1	0	0	0		1.83779e+285	1.83779e-29	314	8.89577e-30	-335	2.06591	649			#NUM!	2.06591e+87		562	31.4	3.1131e-10	4.13761e-10
315	#NUM!		0	0	1	0	1	0	0	0		1.48861e+286	1.48861e-29	315	2.28748e-30	-336	6.50763	651			#NUM!	6.50763e+89		562	31.5	2.71389e-10	3.60345e-10
316	#NUM!		0	0	1	0	1	0	0	0		1.20577e+287	1.20577e-29	316	5.86349e-30	-338	2.05641	654			#NUM!	2.05641e+92		562	31.6	2.36514e-10	3.1373e-10
317	#NUM!		0	0	1	0	1	0	0	0		9.76677e+287	9.76677e-30	317	1.49824e-30	-339	6.51882	656			#NUM!	6.51882e+94		562	31.7	2.06056e-10	2.73061e-10
318	#NUM!		0	0	1	0	1	0	0	0		7.91108e+288	7.91108e-30	318	3.81628e-30	-341	2.07299	659			#NUM!	2.07299e+97		562	31.8	1.79465e-10	2.37592e-10
319	#NUM!		0	0	1	0	1	0	0	0		6.40798e+289	6.40798e-30	319	9.69023e-31	-342	6.61282	661			#NUM!	6.61282e+99		562	31.9	1.56257e-10	2.06668e-10
320	#NUM!		0	0	1	0	1	0	0	0		5.19046e+290	5.19046e-30	320	2.45284e-30	-344	2.1161	664			#NUM!	2.1161e+102		562	32	1.36008e-10	1.79714e-10
321	#NUM!		0	0	1	0	1	0	0	0		4.20427e+291	4.20427e-30	321	6.18941e-31	-345	6.79269	666			#NUM!	6.79269e+104		562	32.1	1.18346e-10	1.56229e-10
322	#NUM!		0	0	1	0	1	0	0	0		3.40546e+292	3.40546e-30	322	1.55696e-30	-347	2.18725	669			#NUM!	2.18725e+107		562	32.2	1.02947e-10	1.35772e-10
323	#NUM!		0	0	1	0	1	0	0	0		2.75842e+293	2.75842e-30	323	3.90446e-31	-348	7.06481	671			#NUM!	7.06481e+109		562	32.3	8.9524e-11	1.17958e-10
324	#NUM!		0	0	1	0	1	0	0	0		2.23432e+294	2.23432e-30	324	9.76115e-31	-350	2.289	674			#NUM!	2.289e+112		562	32.4	7.78274e-11	1.02451e-10
325	#NUM!		0	0	1	0	1	0	0	0		1.8098e+295	1.8098e-30	325	2.43278e-31	-351	7.43924	676			#NUM!	7.43924e+114		562	32.5	6.76385e-11	8.89563e-11
326	#NUM!		0	0	1	0	1	0	0	0		1.46594e+296	1.46594e-30	326	6.04463e-31	-353	2.42519	679			#NUM!	2.42519e+117		562	32.6	5.87657e-11	7.72159e-11
327	#NUM!		0	0	1	0	1	0	0	0		1.18741e+297	1.18741e-30	327	1.49729e-31	-354	7.93038	681			#NUM!	7.93038e+119		562	32.7	5.10414e-11	6.70053e-11
328	#NUM!		0	0	1	0	1	0	0	0		9.61803e+297	9.61803e-31	328	3.69759e-31	-356	2.60116	684			#NUM!	2.60116e+122		562	32.8	4.4319e-11	5.81277e-11
329	#NUM!		0	0	1	0	1	0	0	0		7.79061e+298	7.79061e-31	329	9.10348e-32	-357	8.55783	686			#NUM!	8.55783e+124		562	32.9	3.84705e-11	5.04114e-11
330	#NUM!		0	0	1	0	1	0	0	0		6.31039e+299	6.31039e-31	330	2.23449e-31	-359	2.82408	689			#NUM!	2.82408e+127		562	33	3.33837e-11	4.37066e-11
331	#NUM!		0	0	1	0	1	0	0	0		5.11142e+300	5.11142e-31	331	5.46809e-32	-360	9.34772	691			#NUM!	9.34772e+129		562	33.1	2.89609e-11	3.78825e-11
332	#NUM!		0	0	1	0	1	0	0	0		4.14025e+301	4.14025e-31	332	1.33408e-31	-362	3.10344	694			#NUM!	3.10344e+132		562	33.2	2.51166e-11	3.28249e-11
333	#NUM!		0	0	1	0	1	0	0	0		3.3536e+302	3.3536e-31	333	3.24506e-31	-364	1.03345	697			#NUM!	1.03345e+135		562	33.3	2.17761e-11	2.84343e-11
334	#NUM!		0	0	1	0	1	0	0	0		2.71642e+303	2.71642e-31	334	7.86977e-32	-365	3.45171	699			#NUM!	3.45171e+137		562	33.4	1.88743e-11	2.46238e-11
335	#NUM!		0	0	1	0	1	0	0	0		2.2003e+304	2.2003e-31	335	1.90284e-31	-367	1.15632	702			#NUM!	1.15632e+140		562	33.5	1.63544e-11	2.13177e-11
336	#NUM!		0	0	1	0	1	0	0	0		1.78224e+305	1.78224e-31	336	4.5872e-32	-368	3.88525	704			#NUM!	3.88525e+142		562	33.6	1.41667e-11	1.84503e-11
337	#NUM!		0	0	1	0	1	0	0	0		1.44361e+306	1.44361e-31	337	1.10256e-31	-370	1.30933	707			#NUM!	1.30933e+145		562	33.7	1.22681e-11	1.59639e-11
338	#NUM!		0	0	1	0	1	0	0	0		1.16933e+307	1.16933e-31	338	2.64223e-32	-371	4.42553	709			#NUM!	4.42553e+147		562	33.8	1.06208e-11	1.38086e-11
339	#NUM!		0	0	1	0	1	0	0	0		9.47156e+307	9.47156e-32	339	6.3133e-32	-373	1.50025	712			#NUM!	1.50025e+150		562	33.9	9.19206e-12	1.19409e-11
340	#NUM!		0	0	1	0	1	0	0	0		#NUM!	7.67196e-32	340	1.50405e-32	-374	5.10086	714			#NUM!	5.10086e+152		562	34	7.95318e-12	1.03229e-11
341	#NUM!		0	0	1	0	1	0	0	0		#NUM!	6.21429e-32	341	3.57267e-32	-376	1.73939	717			#NUM!	1.73939e+155		562	34.1	6.87928e-12	8.9216e-12
342	#NUM!		0	0	1	0	1	0	0	0		#NUM!	5.03357e-32	342	8.46159e-33	-377	5.94873	719			#NUM!	5.94873e+157		562	34.2	5.94867e-12	7.70832e-12
343	#NUM!		0	0	1	0	1	0	0	0		#NUM!	4.07719e-32	343	1.99822e-32	-379	2.04041	722			#NUM!	2.04041e+160		562	34.3	5.14246e-12	6.65815e-12
344	#NUM!		0	0	1	0	1	0	0	0		#NUM!	3.30253e-32	344	4.70511e-33	-380	7.01903	724			#NUM!	7.01903e+162		562	34.4	4.44424e-12	5.74944e-12
345	#NUM!		0	0	1	0	1	0	0	0		#NUM!	2.67505e-32	345	1.10468e-32	-382	2.42156	727			#NUM!	2.42156e+165		562	34.5	3.83973e-12	4.96335e-12
346	#NUM!		0	0	1	0	1	0	0	0		#NUM!	2.16679e-32	346	2.5861e-33	-383	8.37861	729			#NUM!	8.37861e+167		562	34.6	3.31649e-12	4.28353e-12
347	#NUM!		0	0	1	0	1	0	0	0		#NUM!	1.7551e-32	347	6.03671e-33	-385	2.90738	732			#NUM!	2.90738e+170		562	34.7	2.86374e-12	3.6958e-12
348	#NUM!		0	0	1	0	1	0	0	0		#NUM!	1.42163e-32	348	1.4051e-32	-387	1.01177	735			#NUM!	1.01177e+173		562	34.8	2.47209e-12	3.18781e-12
349	#NUM!		0	0	1	0	1	0	0	0		#NUM!	1.15152e-32	349	3.26111e-33	-388	3.53107	737			#NUM!	3.53107e+175		562	34.9	2.1334e-12	2.74889e-12
350	#NUM!		0	0	1	0	1	0	0	0		#NUM!	9.32731e-33	350	7.54714e-33	-390	1.23587	740			#NUM!	1.23587e+178		562	35	1.84059e-12	2.36974e-12
351	#NUM!		0	0	1	0	1	0	0	0		#NUM!	7.55512e-33	351	1.74165e-33	-391	4.33792	742			#NUM!	4.33792e+180		562	35.1	1.58753e-12	2.04232e-12
352	#NUM!		0	0	1	0	1	0	0	0		#NUM!	6.11965e-33	352	4.00777e-33	-393	1.52695	745			#NUM!	1.52695e+183		562	35.2	1.36887e-12	1.75965e-12
353	#NUM!		0	0	1	0	1	0	0	0		#NUM!	4.95692e-33	353	9.1963e-34	-394	5.39012	747			#NUM!	5.39012e+185		562	35.3	1.18e-12	1.51569e-12
354	#NUM!		0	0	1	0	1	0	0	0		#NUM!	4.0151e-33	354	2.10424e-33	-396	1.9081	750			#NUM!	1.9081e+188		562	35.4	1.0169e-12	1.30519e-12
355	#NUM!		0	0	1	0	1	0	0	0		#NUM!	3.25223e-33	355	4.80122e-34	-397	6.77377	752			#NUM!	6.77377e+190		562	35.5	8.76106e-13	1.12362e-12
356	#NUM!		0	0	1	0	1	0	0	0		#NUM!	2.63431e-33	356	1.09241e-33	-399	2.41146	755			#NUM!	2.41146e+193		562	35.6	7.54594e-13	9.67046e-13
357	#NUM!		0	0	1	0	1	0	0	0		#NUM!	2.13379e-33	357	2.47858e-34	-400	8.60892	757			#NUM!	8.60892e+195		562	35.7	6.49755e-13	8.32062e-13
358	#NUM!		0	0	1	0	1	0	0	0		#NUM!	1.72837e-33	358	5.60796e-34	-402	3.08199	760			#NUM!	3.08199e+198		562	35.8	5.59327e-13	7.15726e-13
359	#NUM!		0	0	1	0	1	0	0	0		#NUM!	1.39998e-33	359	1.26531e-33	-404	1.10644	763			#NUM!	1.10644e+201		562	35.9	4.81352e-13	6.15488e-13
360	#NUM!		0	0	1	0	1	0	0	0		#NUM!	1.13398e-33	360	2.84694e-34	-405	3.98317	765			#NUM!	3.98317e+203		562	36	4.14133e-13	5.29145e-13
361	#NUM!		0	0	1	0	1	0	0	0		#NUM!	9.18527e-34	361	6.38787e-34	-407	1.43792	768			#NUM!	1.43792e+206		562	36.1	3.56204e-13	4.54793e-13
362	#NUM!		0	0	1	0	1	0	0	0		#NUM!	7.44007e-34	362	1.42933e-34	-408	5.20528	770			#NUM!	5.20528e+208		562	36.2	3.06294e-13	3.90783e-13
363	#NUM!		0	0	1	0	1	0	0	0		#NUM!	6.02645e-34	363	3.18941e-34	-410	1.88952	773			#NUM!	1.88952e+211		562	36.3	2.63305e-13	3.35692e-13
364	#NUM!		0	0	1	0	1	0	0	0		#NUM!	4.88143e-34	364	7.09732e-35	-411	6.87784	775			#NUM!	6.87784e+213		562	36.4	2.26289e-13	2.8829e-13
365	#NUM!		0	0	1	0	1	0	0	0		#NUM!	3.95396e-34	365	1.57502e-34	-413	2.51041	778			#NUM!	2.51041e+216		562	36.5	1.94424e-13	2.47516e-13
366	#NUM!		0	0	1	0	1	0	0	0		#NUM!	3.2027e-34	366	3.48571e-35	-414	9.18811	780			#NUM!	9.18811e+218		562	36.6	1.67e-13	2.12452e-13
367	#NUM!		0	0	1	0	1	0	0	0		#NUM!	2.59419e-34	367	7.69325e-35	-416	3.37204	783			#NUM!	3.37204e+221		562	36.7	1.43406e-13	1.82307e-13
368	#NUM!		0	0	1	0	1	0	0	0		#NUM!	2.10129e-34	368	1.69335e-34	-418	1.24091	786			#NUM!	1.24091e+224		562	36.8	1.23113e-13	1.56398e-13
369	#NUM!		0	0	1	0	1	0	0	0		#NUM!	1.70205e-34	369	3.71711e-35	-419	4.57896	788			#NUM!	4.57896e+226		562	36.9	1.05663e-13	1.34136e-13
370	#NUM!		0	0	1	0	1	0	0	0		#NUM!	1.37866e-34	370	8.13746e-35	-421	1.69421	791			#NUM!	1.69421e+229		562	37	9.06616e-14	1.15012e-13
371	#NUM!		0	0	1	0	1	0	0	0		#NUM!	1.11671e-34	371	1.77664e-35	-422	6.28553	793			#NUM!	6.28553e+231		562	37.1	7.77696e-14	9.85889e-14
372	#NUM!		0	0	1	0	1	0	0	0		#NUM!	9.04538e-35	372	3.86849e-35	-424	2.33822	796			#NUM!	2.33822e+234		562	37.2	6.6693e-14	8.44888e-14
373	#NUM!		0	0	1	0	1	0	0	0		#NUM!	7.32676e-35	373	8.40075e-36	-425	8.72155	798			#NUM!	8.72155e+236		562	37.3	5.71789e-14	7.23863e-14
374	#NUM!		0	0	1	0	1	0	0	0		#NUM!	5.93468e-35	374	1.81941e-35	-427	3.26186	801			#NUM!	3.26186e+239		562	37.4	4.90091e-14	6.20013e-14
375	#NUM!		0	0	1	0	1	0	0	0		#NUM!	4.80709e-35	375	3.92993e-35	-429	1.2232	804			#NUM!	1.2232e+242		562	37.5	4.19955e-14	5.30924e-14
376	#NUM!		0	0	1	0	1	0	0	0		#NUM!	3.89374e-35	376	8.46608e-36	-430	4.59922	806			#NUM!	4.59922e+244		562	37.6	3.59761e-14	4.54518e-14
377	#NUM!		0	0	1	0	1	0	0	0		#NUM!	3.15393e-35	377	1.81897e-35	-432	1.73391	809			#NUM!	1.73391e+247		562	37.7	3.08115e-14	3.89007e-14
378	#NUM!		0	0	1	0	1	0	0	0		#NUM!	2.55468e-35	378	3.8978e-36	-433	6.55417	811			#NUM!	6.55417e+249		562	37.8	2.63813e-14	3.32853e-14
379	#NUM!		0	0	1	0	1	0	0	0		#NUM!	2.06929e-35	379	8.33039e-36	-435	2.48403	814			#NUM!	2.48403e+252		562	37.9	2.25823e-14	2.84731e-14
380	#NUM!		0	0	1	0	1	0	0	0		#NUM!	1.67613e-35	380	1.77569e-36	-436	9.43932	816			#NUM!	9.43932e+254		562	38	1.93252e-14	2.43504e-14
381	#NUM!		0	0	1	0	1	0	0	0		#NUM!	1.35766e-35	381	3.77508e-36	-438	3.59638	819			#NUM!	3.59638e+257		562	38.1	1.65337e-14	2.08193e-14
382	#NUM!		0	0	1	0	1	0	0	0		#NUM!	1.09971e-35	382	8.00476e-36	-440	1.37382	822			#NUM!	1.37382e+260		562	38.2	1.41417e-14	1.77957e-14
383	#NUM!		0	0	1	0	1	0	0	0		#NUM!	8.90763e-36	383	1.69291e-36	-441	5.26172	824			#NUM!	5.26172e+262		562	38.3	1.20927e-14	1.52074e-14
384	#NUM!		0	0	1	0	1	0	0	0		#NUM!	7.21518e-36	384	3.57099e-36	-443	2.0205	827			#NUM!	2.0205e+265		562	38.4	1.03379e-14	1.29922e-14
385	#NUM!		0	0	1	0	1	0	0	0		#NUM!	5.8443e-36	385	7.51299e-37	-444	7.77893	829			#NUM!	7.77893e+267		562	38.5	8.83542e-15	1.10969e-14
386	#NUM!		0	0	1	0	1	0	0	0		#NUM!	4.73388e-36	386	1.57656e-36	-446	3.00267	832			#NUM!	3.00267e+270		562	38.6	7.5494e-15	9.47565e-15
387	#NUM!		0	0	1	0	1	0	0	0		#NUM!	3.83444e-36	387	3.29978e-36	-448	1.16203	835			#NUM!	1.16203e+273		562	38.7	6.44891e-15	8.08924e-15
388	#NUM!		0	0	1	0	1	0	0	0		#NUM!	3.1059e-36	388	6.88871e-37	-449	4.50868	837			#NUM!	4.50868e+275		562	38.8	5.50744e-15	6.90395e-15
389	#NUM!		0	0	1	0	1	0	0	0		#NUM!	2.51578e-36	389	1.43441e-36	-451	1.75388	840			#NUM!	1.75388e+278		562	38.9	4.70222e-15	5.89085e-15
390	#NUM!		0	0	1	0	1	0	0	0		#NUM!	2.03778e-36	390	2.97916e-37	-452	6.84012	842			#NUM!	6.84012e+280		562	39	4.0137e-15	5.02516e-15
391	#NUM!		0	0	1	0	1	0	0	0		#NUM!	1.6506e-36	391	6.17166e-37	-454	2.67449	845			#NUM!	2.67449e+283		562	39.1	3.42514e-15	4.28562e-15
392	#NUM!		0	0	1	0	1	0	0	0		#NUM!	1.33699e-36	392	1.27527e-36	-456	1.0484	848			#NUM!	1.0484e+286		562	39.2	2.92214e-15	3.654e-15
393	#NUM!		0	0	1	0	1	0	0	0		#NUM!	1.08296e-36	393	2.62841e-37	-457	4.12021	850			#NUM!	4.12021e+288		562	39.3	2.49238e-15	3.1147e-15
394	#NUM!		0	0	1	0	1	0	0	0		#NUM!	8.77198e-37	394	5.40359e-37	-459	1.62336	853			#NUM!	1.62336e+291		562	39.4	2.1253e-15	2.65433e-15
395	#NUM!		0	0	1	0	1	0	0	0		#NUM!	7.1053e-37	395	1.10808e-37	-460	6.41228	855			#NUM!	6.41228e+293		562	39.5	1.81182e-15	2.26146e-15
396	#NUM!		0	0	1	0	1	0	0	0		#NUM!	5.75529e-37	396	2.26652e-37	-462	2.53926	858			#NUM!	2.53926e+296		562	39.6	1.54419e-15	1.92625e-15
397	#NUM!		0	0	1	0	1	0	0	0		#NUM!	4.66179e-37	397	4.62439e-37	-464	1.00809	861			#NUM!	1.00809e+299		562	39.7	1.31577e-15	1.64033e-15
398	#NUM!		0	0	1	0	1	0	0	0		#NUM!	3.77605e-37	398	9.41144e-38	-465	4.01219	863			#NUM!	4.01219e+301		562	39.8	1.12086e-15	1.39651e-15
399	#NUM!		0	0	1	0	1	0	0	0		#NUM!	3.0586e-37	399	1.91059e-37	-467	1.60086	866			#NUM!	1.60086e+304		562	39.9	9.54585e-16	1.18863e-15
400	#NUM!		0	0	1	0	1	0	0	0		#NUM!	2.47747e-37	400	3.86895e-38	-468	6.40345	868			#NUM!	6.40345		868	40	8.12775e-16	1.01146e-15
401	#NUM!		0	0	1	0	1	0	0	0		#NUM!	2.00675e-37	401	7.81509e-38	-470	2.56778	871			#NUM!	2567.78		868	40.1	6.91861e-16	8.6048e-16
402	#NUM!		0	0	1	0	1	0	0	0		#NUM!	1.62546e-37	402	1.57468e-37	-472	1.03225	874			#NUM!	1.03225e+06		868	40.2	5.8879e-16	7.31861e-16
403	#NUM!		0	0	1	0	1	0	0	0		#NUM!	1.31663e-37	403	3.16499e-38	-473	4.15996	876			#NUM!	4.15996e+08		868	40.3	5.0095e-16	6.22316e-16
404	#NUM!		0	0	1	0	1	0	0	0		#NUM!	1.06647e-37	404	6.34566e-38	-475	1.68063	879			#NUM!	1.68063e+11		868	40.4	4.26111e-16	5.29039e-16
405	#NUM!		0	0	1	0	1	0	0	0		#NUM!	8.63839e-38	405	1.26913e-38	-476	6.80653	881			#NUM!	6.80653e+13		868	40.5	3.62364e-16	4.49635e-16
406	#NUM!		0	0	1	0	1	0	0	0		#NUM!	6.99709e-38	406	2.53201e-38	-478	2.76345	884			#NUM!	2.76345e+16		868	40.6	3.08078e-16	3.82057e-16
407	#NUM!		0	0	1	0	1	0	0	0		#NUM!	5.66765e-38	407	5.03914e-38	-480	1.12473	887			#NUM!	1.12473e+19		868	40.7	2.61861e-16	3.24558e-16
408	#NUM!		0	0	1	0	1	0	0	0		#NUM!	4.59079e-38	408	1.00042e-38	-481	4.58888	889			#NUM!	4.58888e+21		868	40.8	2.22524e-16	2.75646e-16
409	#NUM!		0	0	1	0	1	0	0	0		#NUM!	3.71854e-38	409	1.98127e-38	-483	1.87685	892			#NUM!	1.87685e+24		868	40.9	1.8905e-16	2.34049e-16
410	#NUM!		0	0	1	0	1	0	0	0		#NUM!	3.01202e-38	410	3.91421e-39	-484	7.69509	894			#NUM!	7.69509e+26		868	41	1.60573e-16	1.98682e-16
411	#NUM!		0	0	1	0	1	0	0	0		#NUM!	2.43974e-38	411	7.71413e-39	-486	3.16268	897			#NUM!	3.16268e+29		868	41.1	1.36352e-16	1.68619e-16
412	#NUM!		0	0	1	0	1	0	0	0		#NUM!	1.97619e-38	412	1.51661e-38	-488	1.30303	900			#NUM!	1.30303e+32		868	41.2	1.15757e-16	1.43071e-16
413	#NUM!		0	0	1	0	1	0	0	0		#NUM!	1.60071e-38	413	2.97447e-39	-489	5.38149	902			#NUM!	5.38149e+34		868	41.3	9.82494e-17	1.21365e-16
414	#NUM!		0	0	1	0	1	0	0	0		#NUM!	1.29658e-38	414	5.81962e-39	-491	2.22794	905			#NUM!	2.22794e+37		868	41.4	8.33696e-17	1.02928e-16
415	#NUM!		0	0	1	0	1	0	0	0		#NUM!	1.05023e-38	415	1.13588e-39	-492	9.24595	907			#NUM!	9.24595e+39		868	41.5	7.07265e-17	8.72714e-17
416	#NUM!		0	0	1	0	1	0	0	0		#NUM!	8.50683e-39	416	2.21168e-39	-494	3.84631	910			#NUM!	3.84631e+42		868	41.6	5.99864e-17	7.39787e-17
417	#NUM!		0	0	1	0	1	0	0	0		#NUM!	6.89053e-39	417	4.29608e-39	-496	1.60391	913			#NUM!	1.60391e+45		868	41.7	5.08652e-17	6.26961e-17
418	#NUM!		0	0	1	0	1	0	0	0		#NUM!	5.58133e-39	418	8.32494e-40	-497	6.70436	915			#NUM!	6.70436e+47		868	41.8	4.31207e-17	5.31217e-17
419	#NUM!		0	0	1	0	1	0	0	0		#NUM!	4.52088e-39	419	1.60936e-39	-499	2.80912	918			#NUM!	2.80912e+50		868	41.9	3.65466e-17	4.49989e-17
420	#NUM!		0	0	1	0	1	0	0	0		#NUM!	3.66191e-39	420	3.10376e-39	-501	1.17983	921			#NUM!	1.17983e+53		868	42	3.09676e-17	3.81093e-17
421	#NUM!		0	0	1	0	1	0	0	0		#NUM!	2.96615e-39	421	5.9716e-40	-502	4.96709	923			#NUM!	4.96709e+55		868	42.1	2.6234e-17	3.2267e-17
422	#NUM!		0	0	1	0	1	0	0	0		#NUM!	2.40258e-39	422	1.14621e-39	-504	2.09611	926			#NUM!	2.09611e+58		868	42.2	2.22188e-17	2.7314e-17
423	#NUM!		0	0	1	0	1	0	0	0		#NUM!	1.94609e-39	423	2.19486e-40	-505	8.86656	928			#NUM!	8.86656e+60		868	42.3	1.88137e-17	2.3116e-17
424	#NUM!		0	0	1	0	1	0	0	0		#NUM!	1.57633e-39	424	4.19302e-40	-507	3.75942	931			#NUM!	3.75942e+63		868	42.4	1.59267e-17	1.95586e-17
425	#NUM!		0	0	1	0	1	0	0	0		#NUM!	1.27683e-39	425	7.9914e-40	-509	1.59775	934			#NUM!	1.59775e+66		868	42.5	1.34796e-17	1.65449e-17
426	#NUM!		0	0	1	0	1	0	0	0		#NUM!	1.03423e-39	426	1.51949e-40	-510	6.80643	936			#NUM!	6.80643e+68		868	42.6	1.14059e-17	1.39923e-17
427	#NUM!		0	0	1	0	1	0	0	0		#NUM!	8.37728e-40	427	2.88241e-40	-512	2.90635	939			#NUM!	2.90635e+71		868	42.7	9.6489e-18	1.18309e-17
428	#NUM!		0	0	1	0	1	0	0	0		#NUM!	6.7856e-40	428	5.45503e-40	-514	1.24392	942			#NUM!	1.24392e+74		868	42.8	8.16069e-18	1.0001e-17
429	#NUM!		0	0	1	0	1	0	0	0		#NUM!	5.49633e-40	429	1.02997e-40	-515	5.3364	944			#NUM!	5.3364e+76		868	42.9	6.90042e-18	8.45225e-18
430	#NUM!		0	0	1	0	1	0	0	0		#NUM!	4.45203e-40	430	1.94018e-40	-517	2.29465	947			#NUM!	2.29465e+79		868	43	5.83343e-18	7.1417e-18
431	#NUM!		0	0	1	0	1	0	0	0		#NUM!	3.60614e-40	431	3.64627e-41	-518	9.88995	949			#NUM!	9.88995e+81		868	43.1	4.93029e-18	6.03298e-18
432	#NUM!		0	0	1	0	1	0	0	0		#NUM!	2.92098e-40	432	6.83676e-41	-520	4.27246	952			#NUM!	4.27246e+84		868	43.2	4.16602e-18	5.09523e-18
433	#NUM!		0	0	1	0	1	0	0	0		#NUM!	2.36599e-40	433	1.27893e-40	-522	1.84998	955			#NUM!	1.84998e+87		868	43.3	3.51942e-18	4.30226e-18
434	#NUM!		0	0	1	0	1	0	0	0		#NUM!	1.91645e-40	434	2.38695e-41	-523	8.02889	957			#NUM!	8.02889e+89		868	43.4	2.9725e-18	3.63189e-18
435	#NUM!		0	0	1	0	1	0	0	0		#NUM!	1.55233e-40	435	4.44466e-41	-525	3.49257	960			#NUM!	3.49257e+92		868	43.5	2.51e-18	3.06528e-18
436	#NUM!		0	0	1	0	1	0	0	0		#NUM!	1.25738e-40	436	8.25728e-41	-527	1.52276	963			#NUM!	1.52276e+95		868	43.6	2.11898e-18	2.58648e-18
437	#NUM!		0	0	1	0	1	0	0	0		#NUM!	1.01848e-40	437	1.53052e-41	-528	6.65446	965			#NUM!	6.65446e+97		868	43.7	1.78847e-18	2.18199e-18
438	#NUM!		0	0	1	0	1	0	0	0		#NUM!	8.2497e-41	438	2.83042e-41	-530	2.91465	968			#NUM!	2.91465e+100		868	43.8	1.50917e-18	1.84034e-18
439	#NUM!		0	0	1	0	1	0	0	0		#NUM!	6.68226e-41	439	5.22242e-41	-532	1.27953	971			#NUM!	1.27953e+103		868	43.9	1.2732e-18	1.55183e-18
440	#NUM!		0	0	1	0	1	0	0	0		#NUM!	5.41263e-41	440	9.614e-42	-533	5.62994	973			#NUM!	5.62994e+105		868	44	1.07388e-18	1.30827e-18
441	#NUM!		0	0	1	0	1	0	0	0		#NUM!	4.38423e-41	441	1.76584e-41	-535	2.48281	976			#NUM!	2.48281e+108		868	44.1	9.05564e-19	1.10269e-18
442	#NUM!		0	0	1	0	1	0	0	0		#NUM!	3.55123e-41	442	3.23604e-41	-537	1.0974	979			#NUM!	1.0974e+111		868	44.2	7.63457e-19	9.29202e-19
443	#NUM!		0	0	1	0	1	0	0	0		#NUM!	2.87649e-41	443	5.91691e-42	-538	4.86148	981			#NUM!	4.86148e+113		868	44.3	6.43506e-19	7.82839e-19
444	#NUM!		0	0	1	0	1	0	0	0		#NUM!	2.32996e-41	444	1.07944e-41	-540	2.1585	984			#NUM!	2.1585e+116		868	44.4	5.42281e-19	6.59384e-19
445	#NUM!		0	0	1	0	1	0	0	0		#NUM!	1.88727e-41	445	1.96482e-42	-541	9.60532	986			#NUM!	9.60532e+118		868	44.5	4.56876e-19	5.55276e-19
446	#NUM!		0	0	1	0	1	0	0	0		#NUM!	1.52869e-41	446	3.56839e-42	-543	4.28397	989			#NUM!	4.28397e+121		868	44.6	3.84837e-19	4.67503e-19
447	#NUM!		0	0	1	0	1	0	0	0		#NUM!	1.23824e-41	447	6.4662e-42	-545	1.91494	992			#NUM!	1.91494e+124		868	44.7	3.24085e-19	3.93518e-19
448	#NUM!		0	0	1	0	1	0	0	0		#NUM!	1.00297e-41	448	1.16911e-42	-546	8.57891	994			#NUM!	8.57891e+126		868	44.8	2.72863e-19	3.31168e-19
449	#NUM!		0	0	1	0	1	0	0	0		#NUM!	8.12407e-42	449	2.10909e-42	-548	3.85193	997			#NUM!	3.85193e+129		868	44.9	2.29686e-19	2.78637e-19
450	#NUM!		0	0	1	0	1	0	0	0		#NUM!	6.58049e-42	450	3.79636e-42	-550	1.73337	1000			#NUM!	1.73337e+132		868	45	1.93299e-19	2.34387e-19
451	#NUM!		0	0	1	0	1	0	0	0		#NUM!	5.3302e-42	451	6.8183e-43	-551	7.81749	1002			#NUM!	7.81749e+134		868	45.1	1.6264e-19	1.97122e-19
452	#NUM!		0	0	1	0	1	0	0	0		#NUM!	4.31746e-42	452	1.22186e-42	-553	3.53351	1005			#NUM!	3.53351e+137		868	45.2	1.36814e-19	1.65745e-19
453	#NUM!		0	0	1	0	1	0	0	0		#NUM!	3.49714e-42	453	2.18479e-42	-555	1.60068	1008			#NUM!	1.60068e+140		868	45.3	1.15064e-19	1.39332e-19
454	#NUM!		0	0	1	0	1	0	0	0		#NUM!	2.83269e-42	454	3.89797e-43	-556	7.26708	1010			#NUM!	7.26708e+142		868	45.4	9.67505e-20	1.17104e-19
455	#NUM!		0	0	1	0	1	0	0	0		#NUM!	2.29448e-42	455	6.93924e-43	-558	3.30652	1013			#NUM!	3.30652e+145		868	45.5	8.13341e-20	9.84e-20
456	#NUM!		0	0	1	0	1	0	0	0		#NUM!	1.85853e-42	456	1.23263e-42	-560	1.50777	1016			#NUM!	1.50777e+148		868	45.6	6.83592e-20	8.26658e-20
457	#NUM!		0	0	1	0	1	0	0	0		#NUM!	1.50541e-42	457	2.18475e-43	-561	6.89053	1018			#NUM!	6.89053e+150		868	45.7	5.74417e-20	6.94327e-20
458	#NUM!		0	0	1	0	1	0	0	0		#NUM!	1.21938e-42	458	3.86385e-43	-563	3.15586	1021			#NUM!	3.15586e+153		868	45.8	4.82574e-20	5.83054e-20
459	#NUM!		0	0	1	0	1	0	0	0		#NUM!	9.87697e-43	459	6.81857e-43	-565	1.44854	1024			#NUM!	1.44854e+156		868	45.9	4.05328e-20	4.89508e-20
460	#NUM!		0	0	1	0	1	0	0	0		#NUM!	8.00034e-43	460	1.20066e-43	-566	6.66329	1026			#NUM!	6.66329e+158		868	46	3.40374e-20	4.10884e-20
461	#NUM!		0	0	1	0	1	0	0	0		#NUM!	6.48028e-43	461	2.10962e-43	-568	3.07177	1029			#NUM!	3.07177e+161		868	46.1	2.85767e-20	3.44815e-20
462	#NUM!		0	0	1	0	1	0	0	0		#NUM!	5.24903e-43	462	3.69869e-43	-570	1.41916	1032			#NUM!	1.41916e+164		868	46.2	2.39869e-20	2.89308e-20
463	#NUM!		0	0	1	0	1	0	0	0		#NUM!	4.25171e-43	463	6.4707e-44	-571	6.57071	1034			#NUM!	6.57071e+166		868	46.3	2.013e-20	2.42684e-20
464	#NUM!		0	0	1	0	1	0	0	0		#NUM!	3.44389e-43	464	1.12958e-43	-573	3.04881	1037			#NUM!	3.04881e+169		868	46.4	1.68896e-20	2.03532e-20
465	#NUM!		0	0	1	0	1	0	0	0		#NUM!	2.78955e-43	465	1.96766e-43	-575	1.4177	1040			#NUM!	1.4177e+172		868	46.5	1.41679e-20	1.70659e-20
466	#NUM!		0	0	1	0	1	0	0	0		#NUM!	2.25953e-43	466	3.42019e-44	-576	6.60647	1042			#NUM!	6.60647e+174		868	46.6	1.18822e-20	1.43066e-20
467	#NUM!		0	0	1	0	1	0	0	0		#NUM!	1.83022e-43	467	5.93223e-44	-578	3.08522	1045			#NUM!	3.08522e+177		868	46.7	9.96313e-21	1.19909e-20
468	#NUM!		0	0	1	0	1	0	0	0		#NUM!	1.48248e-43	468	1.02673e-43	-580	1.44388	1048			#NUM!	1.44388e+180		868	46.8	8.35225e-21	1.00479e-20
469	#NUM!		0	0	1	0	1	0	0	0		#NUM!	1.20081e-43	469	1.77325e-44	-581	6.77181	1050			#NUM!	6.77181e+182		868	46.9	7.00034e-21	8.41802e-21
470	#NUM!		0	0	1	0	1	0	0	0		#NUM!	9.72655e-44	470	3.05602e-44	-583	3.18275	1053			#NUM!	3.18275e+185		868	47	5.86601e-21	7.05103e-21
471	#NUM!		0	0	1	0	1	0	0	0		#NUM!	7.87851e-44	471	5.25558e-44	-585	1.49908	1056			#NUM!	1.49908e+188		868	47.1	4.91446e-21	5.90479e-21
472	#NUM!		0	0	1	0	1	0	0	0		#NUM!	6.38159e-44	472	9.0191e-45	-586	7.07564	1058			#NUM!	7.07564e+190		868	47.2	4.1164e-21	4.94386e-21
473	#NUM!		0	0	1	0	1	0	0	0		#NUM!	5.16909e-44	473	1.5445e-44	-588	3.34678	1061			#NUM!	3.34678e+193		868	47.3	3.44721e-21	4.13844e-21
474	#NUM!		0	0	1	0	1	0	0	0		#NUM!	4.18696e-44	474	2.63933e-44	-590	1.58637	1064			#NUM!	1.58637e+196		868	47.4	2.8862e-21	3.46353e-21
475	#NUM!		0	0	1	0	1	0	0	0		#NUM!	3.39144e-44	475	4.50075e-45	-591	7.53527	1066			#NUM!	7.53527e+198		868	47.5	2.41599e-21	2.89808e-21
476	#NUM!		0	0	1	0	1	0	0	0		#NUM!	2.74707e-44	476	7.65885e-45	-593	3.58679	1069			#NUM!	3.58679e+201		868	47.6	2.02197e-21	2.42444e-21
477	#NUM!		0	0	1	0	1	0	0	0		#NUM!	2.22512e-44	477	1.30056e-44	-595	1.7109	1072			#NUM!	1.7109e+204		868	47.7	1.69185e-21	2.02779e-21
478	#NUM!		0	0	1	0	1	0	0	0		#NUM!	1.80235e-44	478	2.20388e-45	-596	8.17809	1074			#NUM!	8.17809e+206		868	47.8	1.41534e-21	1.69569e-21
479	#NUM!		0	0	1	0	1	0	0	0		#NUM!	1.4599e-44	479	3.72681e-45	-598	3.9173	1077			#NUM!	3.9173e+209		868	47.9	1.18377e-21	1.41769e-21
480	#NUM!		0	0	1	0	1	0	0	0		#NUM!	1.18252e-44	480	6.28898e-45	-600	1.88031	1080			#NUM!	1.88031e+212		868	48	9.8989e-22	1.18502e-21
481	#NUM!		0	0	1	0	1	0	0	0		#NUM!	9.57842e-45	481	1.05906e-45	-601	9.04427	1082			#NUM!	9.04427e+214		868	48.1	8.27591e-22	9.90332e-22
482	#NUM!		0	0	1	0	1	0	0	0		#NUM!	7.75852e-45	482	1.77975e-45	-603	4.35934	1085			#NUM!	4.35934e+217		868	48.2	6.91759e-22	8.27462e-22
483	#NUM!		0	0	1	0	1	0	0	0		#NUM!	6.2844e-45	483	2.98467e-45	-605	2.10556	1088			#NUM!	2.10556e+220		868	48.3	5.78103e-22	6.91237e-22
484	#NUM!		0	0	1	0	1	0	0	0		#NUM!	5.09037e-45	484	4.99501e-45	-607	1.01909	1091			#NUM!	1.01909e+223		868	48.4	4.83022e-22	5.77321e-22
485	#NUM!		0	0	1	0	1	0	0	0		#NUM!	4.1232e-45	485	8.34217e-46	-608	4.94259	1093			#NUM!	4.94259e+225		868	48.5	4.03496e-22	4.82081e-22
486	#NUM!		0	0	1	0	1	0	0	0		#NUM!	3.33979e-45	486	1.39036e-45	-610	2.4021	1096			#NUM!	2.4021e+228		868	48.6	3.36995e-22	4.02471e-22
487	#NUM!		0	0	1	0	1	0	0	0		#NUM!	2.70523e-45	487	2.31251e-45	-612	1.16982	1099			#NUM!	1.16982e+231		868	48.7	2.81396e-22	3.3594e-22
488	#NUM!		0	0	1	0	1	0	0	0		#NUM!	2.19124e-45	488	3.83839e-46	-613	5.70874	1101			#NUM!	5.70874e+233		868	48.8	2.34923e-22	2.80351e-22
489	#NUM!		0	0	1	0	1	0	0	0		#NUM!	1.7749e-45	489	6.35807e-46	-615	2.79157	1104			#NUM!	2.79157e+236		868	48.9	1.96085e-22	2.33913e-22
490	#NUM!		0	0	1	0	1	0	0	0		#NUM!	1.43767e-45	490	1.05103e-45	-617	1.36787	1107			#NUM!	1.36787e+239		868	49	1.63635e-22	1.95128e-22
491	#NUM!		0	0	1	0	1	0	0	0		#NUM!	1.16451e-45	491	1.73388e-46	-618	6.71624	1109			#NUM!	6.71624e+241		868	49.1	1.36527e-22	1.62741e-22
492	#NUM!		0	0	1	0	1	0	0	0		#NUM!	9.43255e-46	492	2.85455e-46	-620	3.30439	1112			#NUM!	3.30439e+244		868	49.2	1.13887e-22	1.35702e-22
493	#NUM!		0	0	1	0	1	0	0	0		#NUM!	7.64037e-46	493	4.69003e-46	-622	1.62907	1115			#NUM!	1.62907e+247		868	49.3	9.49825e-23	1.13134e-22
494	#NUM!		0	0	1	0	1	0	0	0		#NUM!	6.1887e-46	494	7.69013e-47	-623	8.04758	1117			#NUM!	8.04758e+249		868	49.4	7.91999e-23	9.42996e-23
495	#NUM!		0	0	1	0	1	0	0	0		#NUM!	5.01285e-46	495	1.25839e-46	-625	3.98355	1120			#NUM!	3.98355e+252		868	49.5	6.60266e-23	7.85854e-23
496	#NUM!		0	0	1	0	1	0	0	0		#NUM!	4.06041e-46	496	2.05503e-46	-627	1.97584	1123			#NUM!	1.97584e+255		868	49.6	5.50334e-23	6.54767e-23
497	#NUM!		0	0	1	0	1	0	0	0		#NUM!	3.28893e-46	497	3.34924e-47	-628	9.81994	1125			#NUM!	9.81994e+257		868	49.7	4.58614e-23	5.45439e-23
498	#NUM!		0	0	1	0	1	0	0	0		#NUM!	2.66403e-46	498	5.44755e-47	-630	4.89033	1128			#NUM!	4.89033e+260		868	49.8	3.82104e-23	4.54276e-23
499	#NUM!		0	0	1	0	1	0	0	0		#NUM!	2.15787e-46	499	8.84272e-47	-632	2.44027	1131			#NUM!	2.44027e+263		868	49.9	3.18294e-23	3.78275e-23
500	#NUM!		0	0	1	0	1	0	0	0		#NUM!	1.74787e-46	500	1.43252e-46	-634	1.22014	1134			#NUM!	1.22014e+266		868	50	2.65088e-23	3.14927e-23
																									50.1	2.20733e-23	2.62137e-23
																									50.2	1.83762e-23	2.18152e-23
																									50.3	1.52954e-23	1.81513e-23
																									50.4	1.27286e-23	1.50997e-23
																									50.5	1.05904e-23	1.25587e-23
																									50.6	8.80969e-24	1.04433e-23
																									50.7	7.32696e-24	8.68256e-24
																									50.8	6.0926e-24	7.21726e-24
																									50.9	5.0652e-24	5.99809e-24
																									51	4.21023e-24	4.9839e-24
																									51.1	3.49889e-24	4.1404e-24
																									51.2	2.90718e-24	3.439e-24
																					1.22014	1134			51.3	2.41506e-24	2.85587e-24
																									51.4	2.00586e-24	2.37116e-24
																									51.5	1.66568e-24	1.96834e-24
																									51.6	1.38292e-24	1.63364e-24
																									51.7	1.14794e-24	1.3556e-24
																									51.8	9.52704e-25	1.12466e-24
																									51.9	7.90522e-25	9.32893e-25
																									52	6.55824e-25	7.73675e-25
																									52.1	5.43974e-25	6.4151e-25
																									52.2	4.51114e-25	5.31822e-25
																									52.3	3.74034e-25	4.40806e-25
																									52.4	3.10067e-25	3.65297e-25
																									52.5	2.5699e-25	3.02666e-25
																									52.6	2.12959e-25	2.50727e-25
																									52.7	1.76438e-25	2.07661e-25
																									52.8	1.46153e-25	1.71961e-25
																									52.9	1.21044e-25	1.42371e-25
																									53	1.0023e-25	1.17851e-25
																									53.1	8.2979e-26	9.75364e-26
																									53.2	6.86846e-26	8.07083e-26
																									53.3	5.6842e-26	6.67712e-26
																									53.4	4.70326e-26	5.52306e-26
																									53.5	3.89088e-26	4.56763e-26
																									53.6	3.21822e-26	3.77678e-26
																									53.7	2.66136e-26	3.12229e-26
																									53.8	2.20045e-26	2.58074e-26
																									53.9	1.81903e-26	2.13273e-26
																									54	1.50345e-26	1.76218e-26
																									54.1	1.24238e-26	1.45574e-26
																									54.2	1.02647e-26	1.20237e-26
																									54.3	8.47919e-27	9.92918e-27
																									54.4	7.00301e-27	8.19805e-27
																									54.5	5.78277e-27	6.76751e-27
																									54.6	4.77428e-27	5.58559e-27
																									54.7	3.94095e-27	4.60925e-27
																									54.8	3.25249e-27	3.80289e-27
																									54.9	2.68381e-27	3.13704e-27
																									55	2.21417e-27	2.5873e-27
																									55.1	1.82637e-27	2.13352e-27
																									55.2	1.50623e-27	1.75902e-27
																									55.3	1.24198e-27	1.44999e-27
																									55.4	1.02391e-27	1.19504e-27
																									55.5	8.43972e-28	9.84741e-28
																									55.6	6.95534e-28	8.11307e-28
																									55.7	5.73101e-28	6.683e-28
																									55.8	4.72136e-28	5.50403e-28
																									55.9	3.88889e-28	4.53225e-28
																									56	3.20263e-28	3.73138e-28
																									56.1	2.63701e-28	3.0715e-28
																									56.2	2.1709e-28	2.52786e-28
																									56.3	1.78686e-28	2.08008e-28
																									56.4	1.4705e-28	1.71133e-28
																									56.5	1.20994e-28	1.40769e-28
																									56.6	9.95375e-29	1.15773e-28
																									56.7	8.18716e-29	9.5199e-29
																									56.8	6.73292e-29	7.82674e-29
																									56.9	5.53603e-29	6.43361e-29
																									57	4.55111e-29	5.28753e-29
																									57.1	3.74077e-29	4.34486e-29
																									57.2	3.07418e-29	3.56964e-29
																									57.3	2.52593e-29	2.93223e-29
																									57.4	2.0751e-29	2.40822e-29
																									57.5	1.70444e-29	1.97752e-29
																									57.6	1.39975e-29	1.62357e-29
																									57.7	1.14932e-29	1.33274e-29
																									57.8	9.43541e-30	1.09382e-29
																									57.9	7.7447e-30	8.97582e-30
																									58	6.35586e-30	7.36423e-30
																									58.1	5.21518e-30	6.04097e-30
																									58.2	4.27849e-30	4.95464e-30
																									58.3	3.50944e-30	4.06298e-30
																									58.4	2.87814e-30	3.33122e-30
																									58.5	2.35999e-30	2.73079e-30
																									58.6	1.9348e-30	2.23821e-30
																									58.7	1.58595e-30	1.83417e-30
																									58.8	1.29978e-30	1.50282e-30
																									58.9	1.06506e-30	1.23112e-30
																									59	8.72584e-31	1.00837e-30
																									59.1	7.14771e-31	8.25786e-31
																									59.2	5.85402e-31	6.7615e-31
																									59.3	4.79367e-31	5.53536e-31
																									59.4	3.92473e-31	4.53082e-31
																									59.5	3.21276e-31	3.70797e-31
																									59.6	2.62951e-31	3.03405e-31
																									59.7	2.15179e-31	2.48221e-31
																									59.8	1.76057e-31	2.0304e-31
																									59.9	1.44023e-31	1.66055e-31
																									60	1.17799e-31	1.35785e-31
																									60.1	9.63336e-32	1.11015e-31
																									60.2	7.87667e-32	9.07483e-32
																									60.3	6.43926e-32	7.41694e-32
																									60.4	5.2633e-32	6.06094e-32
																									60.5	4.30139e-32	4.95204e-32
																									60.6	3.5147e-32	4.04536e-32
																									60.7	2.87142e-32	3.30415e-32
																									60.8	2.34549e-32	2.69831e-32
																									60.9	1.91558e-32	2.2032e-32
																									61	1.56421e-32	1.79864e-32
																									61.1	1.27709e-32	1.46813e-32
																									61.2	1.0425e-32	1.19817e-32
																									61.3	8.50865e-33	9.77682e-33
																									61.4	6.94344e-33	7.97643e-33
																									61.5	5.66524e-33	6.50653e-33
																									61.6	4.6216e-33	5.30665e-33
																									61.7	3.76961e-33	4.32735e-33
																									61.8	3.07419e-33	3.52821e-33
																									61.9	2.50666e-33	2.87619e-33
																									62	2.04357e-33	2.34429e-33
																									62.1	1.66577e-33	1.91045e-33
																									62.2	1.3576e-33	1.55665e-33
																									62.3	1.10626e-33	1.26817e-33
																									62.4	9.01312e-34	1.03299e-33
																									62.5	7.34215e-34	8.41288e-34
																									62.6	5.98002e-34	6.85055e-34
																									62.7	4.86983e-34	5.57747e-34
																									62.8	3.96511e-34	4.54026e-34
																									62.9	3.22797e-34	3.69535e-34
																									63	2.62745e-34	3.00721e-34
																									63.1	2.13831e-34	2.44682e-34
																									63.2	1.73996e-34	1.99055e-34
																									63.3	1.41559e-34	1.61911e-34
																									63.4	1.15152e-34	1.31678e-34
																									63.5	9.36558e-35	1.07073e-34
																									63.6	7.61607e-35	8.70523e-35
																									63.7	6.1924e-35	7.07641e-35
																									63.8	5.03408e-35	5.75147e-35
																									63.9	4.09179e-35	4.67387e-35
																									64	3.32536e-35	3.79759e-35
																									64.1	2.70208e-35	3.08512e-35
																									64.2	2.19527e-35	2.50593e-35
																									64.3	1.78325e-35	2.03517e-35
																									64.4	1.44834e-35	1.65258e-35
																									64.5	1.17614e-35	1.34172e-35
																									64.6	9.54956e-36	1.08916e-35
																									64.7	7.75247e-36	8.84006e-36
																									64.8	6.2926e-36	7.17386e-36
																									64.9	5.10686e-36	5.82083e-36
																									65	4.14391e-36	4.72226e-36
																									65.1	3.36203e-36	3.83045e-36
																									65.2	2.72726e-36	3.10659e-36
																									65.3	2.212e-36	2.51913e-36
																									65.4	1.79381e-36	2.04246e-36
																									65.5	1.45447e-36	1.65573e-36
																									65.6	1.17914e-36	1.34203e-36
																									65.7	9.55784e-37	1.08759e-36
																									65.8	7.74621e-37	8.81265e-37
																									65.9	6.27701e-37	7.13973e-37
																									66	5.08571e-37	5.78351e-37
																									66.1	4.11988e-37	4.68421e-37
																									66.2	3.33698e-37	3.79329e-37
																									66.3	2.70244e-37	3.07136e-37
																									66.4	2.18824e-37	2.48646e-37
																									66.5	1.77161e-37	2.01265e-37
																									66.6	1.43409e-37	1.62888e-37
																									66.7	1.1607e-37	1.31809e-37
																									66.8	9.39286e-38	1.06644e-37
																									66.9	7.59997e-38	8.62712e-38
																									67	6.1484e-38	6.97798e-38
																									67.1	4.97333e-38	5.64326e-38
																									67.2	4.02225e-38	4.56316e-38
																									67.3	3.25257e-38	3.68925e-38
																									67.4	2.62978e-38	2.98226e-38
																									67.5	2.12593e-38	2.41041e-38
																									67.6	1.71836e-38	1.94792e-38
																									67.7	1.38872e-38	1.57394e-38
																									67.8	1.12216e-38	1.27158e-38
																									67.9	9.06624e-39	1.02715e-38
																									68	7.32383e-39	8.29585e-39
																									68.1	5.91542e-39	6.69924e-39
																									68.2	4.77716e-39	5.40912e-39
																									68.3	3.85736e-39	4.36682e-39
																									68.4	3.11421e-39	3.52485e-39
																									68.5	2.51387e-39	2.84481e-39
																									68.6	2.02897e-39	2.29563e-39
																									68.7	1.63736e-39	1.85221e-39
																									68.8	1.32114e-39	1.49422e-39
																									68.9	1.06584e-39	1.20525e-39
																									69	8.59754e-40	9.72025e-40
																									69.1	6.93414e-40	7.83818e-40
																									69.2	5.59176e-40	6.31962e-40
																									69.3	4.5086e-40	5.09454e-40
																									69.4	3.63474e-40	4.10635e-40
																									69.5	2.92983e-40	3.30937e-40
																									69.6	2.3613e-40	2.6667e-40
																									69.7	1.90281e-40	2.14852e-40
																									69.8	1.53313e-40	1.73079e-40
																									69.9	1.2351e-40	1.39408e-40
																									70	9.94858e-41	1.12271e-40
																									70.1	8.01234e-41	9.04044e-41
																									70.2	6.45203e-41	7.27861e-41
																									70.3	5.19484e-41	5.85931e-41
																									70.4	4.18202e-41	4.7161e-41
																									70.5	3.36619e-41	3.79541e-41
																									70.6	2.70914e-41	3.05403e-41
																									70.7	2.18002e-41	2.45712e-41
																									70.8	1.75401e-41	1.97661e-41
																									70.9	1.41104e-41	1.58984e-41
																									71	1.13498e-41	1.27857e-41
																									71.1	9.12798e-42	1.0281e-41
																									71.2	7.34009e-42	8.26583e-42
																									71.3	5.90157e-42	6.64472e-42
																									71.4	4.74431e-42	5.34081e-42
																									71.5	3.81345e-42	4.29217e-42
																									71.6	3.0648e-42	3.44895e-42
																									71.7	2.46279e-42	2.771e-42
																									71.8	1.97875e-42	2.22601e-42
																									71.9	1.58963e-42	1.78796e-42
																									72	1.27685e-42	1.43591e-42
																									72.1	1.02547e-42	1.15302e-42
																									72.2	8.23473e-43	9.25741e-43
																									72.3	6.61171e-43	7.43157e-43
																									72.4	5.30786e-43	5.96503e-43
																									72.5	4.26054e-43	4.78725e-43
																									72.6	3.41941e-43	3.84149e-43
																									72.7	2.74396e-43	3.08215e-43
																									72.8	2.20163e-43	2.47257e-43
																									72.9	1.76625e-43	1.98328e-43
																									73	1.41678e-43	1.5906e-43
																									73.1	1.1363e-43	1.2755e-43
																									73.2	9.1122e-44	1.02268e-43
																									73.3	7.30626e-44	8.19861e-44
																									73.4	5.85745e-44	6.57177e-44
																									73.5	4.69529e-44	5.26703e-44
																									73.6	3.76321e-44	4.22076e-44
																									73.7	3.01575e-44	3.38187e-44
																									73.8	2.41643e-44	2.70935e-44
																									73.9	1.93595e-44	2.17028e-44
																									74	1.5508e-44	1.73823e-44
																									74.1	1.24211e-44	1.39201e-44
																									74.2	9.94728e-45	1.11459e-44
																									74.3	7.9651e-45	8.92349e-45
																									74.4	6.37706e-45	7.14323e-45
																									74.5	5.10495e-45	5.71738e-45
																									74.6	4.08606e-45	4.57553e-45
																									74.7	3.27009e-45	3.66124e-45
																									74.8	2.61672e-45	2.92926e-45
																									74.9	2.09362e-45	2.34331e-45
																									75	1.67486e-45	1.87432e-45
																									75.1	1.33969e-45	1.499e-45
																									75.2	1.07145e-45	1.19867e-45
																									75.3	8.56804e-46	9.58391e-46
																									75.4	6.85068e-46	7.66175e-46
																									75.5	5.47683e-46	6.1243e-46
																									75.6	4.37792e-46	4.89472e-46
																									75.7	3.49904e-46	3.91149e-46
																									75.8	2.79623e-46	3.12536e-46
																									75.9	2.23429e-46	2.4969e-46
																									76	1.78505e-46	1.99455e-46
																									76.1	1.42595e-46	1.59307e-46
																									76.2	1.13894e-46	1.27223e-46
																									76.3	9.09582e-47	1.01587e-46
																									76.4	7.26316e-47	8.1107e-47
																									76.5	5.799e-47	6.47471e-47
																									76.6	4.62939e-47	5.16804e-47
																									76.7	3.6952e-47	4.12454e-47
																									76.8	2.94915e-47	3.29132e-47
																									76.9	2.35342e-47	2.62608e-47
																									77	1.87778e-47	2.09502e-47
																									77.1	1.49808e-47	1.67115e-47
																									77.2	1.195e-47	1.33286e-47
																									77.3	9.5312e-48	1.06292e-47
																									77.4	7.60098e-48	8.47536e-48
																									77.5	6.06089e-48	6.75712e-48
																									77.6	4.83223e-48	5.38653e-48
																									77.7	3.85214e-48	4.2934e-48
																									77.8	3.07045e-48	3.42167e-48
																									77.9	2.44707e-48	2.72659e-48
																									78	1.95e-48	2.17243e-48
																									78.1	1.55371e-48	1.73068e-48
																									78.2	1.23779e-48	1.37858e-48
																									78.3	9.85986e-49	1.09798e-48
																									78.4	7.85306e-49	8.7438e-49
																									78.5	6.25391e-49	6.96228e-49
																									78.6	4.97977e-49	5.54304e-49
																									78.7	3.96472e-49	4.41255e-49
																									78.8	3.15618e-49	3.51218e-49
																									78.9	2.5122e-49	2.79518e-49
																									79	1.99937e-49	2.22427e-49
																									79.1	1.59103e-49	1.76974e-49
																									79.2	1.26592e-49	1.40792e-49
																									79.3	1.00712e-49	1.11994e-49
																									79.4	8.0113e-50	8.90747e-50
																									79.5	6.37191e-50	7.08371e-50
																									79.6	5.06736e-50	5.63265e-50
																									79.7	4.02939e-50	4.47827e-50
																									79.8	3.20364e-50	3.56004e-50
																									79.9	2.54679e-50	2.82973e-50
																									80	2.02436e-50	2.24896e-50
																									80.1	1.6089e-50	1.78716e-50
																									80.2	1.27855e-50	1.42001e-50
																									80.3	1.0159e-50	1.12815e-50
																									80.4	8.07109e-51	8.96166e-51
																									80.5	6.41149e-51	7.11798e-51
																									80.6	5.09251e-51	5.6529e-51
																									80.7	4.04437e-51	4.48882e-51
																									80.8	3.21157e-51	3.56402e-51
																									80.9	2.54994e-51	2.8294e-51
																									81	2.02436e-51	2.24593e-51
																									81.1	1.60692e-51	1.78256e-51
																									81.2	1.2754e-51	1.41462e-51
																									81.3	1.01215e-51	1.12248e-51
																									81.4	8.03143e-52	8.90573e-52
																									81.5	6.37215e-52	7.0649e-52
																									81.6	5.05506e-52	5.60388e-52
																									81.7	4.00972e-52	4.44447e-52
																									81.8	3.18016e-52	3.5245e-52
																									81.9	2.52192e-52	2.79462e-52
																									82	1.99968e-52	2.21562e-52
																									82.1	1.58539e-52	1.75637e-52
																									82.2	1.25678e-52	1.39214e-52
																									82.3	9.96166e-53	1.10331e-52
																									82.4	7.89497e-53	8.74304e-53
																									82.5	6.25629e-53	6.92745e-53
																									82.6	4.95714e-53	5.48823e-53
																									82.7	3.92729e-53	4.34749e-53
																									82.8	3.11102e-53	3.44344e-53
																									82.9	2.46411e-53	2.72707e-53
																									83	1.95149e-53	2.15947e-53
																									83.1	1.54533e-53	1.7098e-53
																									83.2	1.22355e-53	1.3536e-53
																									83.3	9.68661e-54	1.07149e-53
																									83.4	7.66778e-54	8.48068e-54
																									83.5	6.06898e-54	6.71154e-54
																									83.6	4.80297e-54	5.31083e-54
																									83.7	3.80061e-54	4.20195e-54
																									83.8	3.00708e-54	3.32421e-54
																									83.9	2.37894e-54	2.62951e-54
																									84	1.88179e-54	2.07974e-54
																									84.1	1.48836e-54	1.64472e-54
																									84.2	1.17705e-54	1.30054e-54
																									84.3	9.30741e-55	1.02827e-54
																									84.4	7.35889e-55	8.12897e-55
																									84.5	5.8176e-55	6.42561e-55
																									84.6	4.59859e-55	5.07858e-55
																									84.7	3.63458e-55	4.01346e-55
																									84.8	2.87232e-55	3.17136e-55
																									84.9	2.26966e-55	2.50565e-55
																									85	1.79324e-55	1.97946e-55
																									85.1	1.41666e-55	1.56358e-55
																									85.2	1.11903e-55	1.23493e-55
																									85.3	8.83822e-56	9.7525e-56
																									85.4	6.97974e-56	7.70084e-56
																									85.5	5.51141e-56	6.08009e-56
																									85.6	4.35147e-56	4.7999e-56
																									85.7	3.43525e-56	3.78881e-56
																									85.8	2.71163e-56	2.99036e-56
																									85.9	2.14019e-56	2.35991e-56
																									86	1.68898e-56	1.86215e-56
																									86.1	1.33274e-56	1.46922e-56
																									86.2	1.05152e-56	1.15906e-56
																									86.3	8.29544e-57	9.14276e-57
																									86.4	6.54351e-57	7.21104e-57
																									86.5	5.16098e-57	5.68681e-57
																									86.6	4.07008e-57	4.48425e-57
																									86.7	3.20941e-57	3.53558e-57
																									86.8	2.53044e-57	2.78729e-57
																									86.9	1.99489e-57	2.19712e-57
																									87	1.5725e-57	1.73172e-57
																									87.1	1.23941e-57	1.36474e-57
																									87.2	9.76757e-58	1.07541e-57
																									87.3	7.6968e-58	8.47319e-58
																									87.4	6.06435e-58	6.67531e-58
																									87.5	4.77759e-58	5.25832e-58
																									87.6	3.76343e-58	4.14165e-58
																									87.7	2.96422e-58	3.26175e-58
																									87.8	2.33446e-58	2.56849e-58
																									87.9	1.83829e-58	2.02235e-58
																									88	1.44742e-58	1.59216e-58
																									88.1	1.13952e-58	1.25334e-58
																									88.2	8.97022e-59	9.86505e-59
																									88.3	7.06048e-59	7.76394e-59
																									88.4	5.5567e-59	6.10965e-59
																									88.5	4.37271e-59	4.80731e-59
																									88.6	3.44061e-59	3.78215e-59
																									88.7	2.7069e-59	2.97527e-59
																									88.8	2.12941e-59	2.34027e-59
																									88.9	1.67493e-59	1.84059e-59
																									89	1.31731e-59	1.44744e-59
																									89.1	1.03593e-59	1.13814e-59
																									89.2	8.1456e-60	8.9483e-60
																									89.3	6.40424e-60	7.03457e-60
																									89.4	5.03459e-60	5.52952e-60
																									89.5	3.95742e-60	4.34599e-60
																									89.6	3.11037e-60	3.4154e-60
																									89.7	2.44435e-60	2.68377e-60
																									89.8	1.92074e-60	2.10864e-60
																									89.9	1.50912e-60	1.65658e-60
																									90	1.18558e-60	1.30129e-60
																									90.1	9.31301e-61	1.02208e-60
																									90.2	7.31478e-61	8.02695e-61
																									90.3	5.74467e-61	6.3033e-61
																									90.4	4.51108e-61	4.94923e-61
																									90.5	3.542e-61	3.88562e-61
																									90.6	2.7808e-61	3.05024e-61
																									90.7	2.18294e-61	2.3942e-61
																									90.8	1.71343e-61	1.87906e-61
																									90.9	1.34476e-61	1.47459e-61
																									91	1.0553e-61	1.15706e-61
																									91.1	8.2805e-62	9.07808e-62
																									91.2	6.49668e-62	7.1217e-62
																									91.3	5.09659e-62	5.58632e-62
																									91.4	3.99779e-62	4.38149e-62
																									91.5	3.13554e-62	3.43613e-62
																									91.6	2.459e-62	2.69445e-62
																									91.7	1.92822e-62	2.11264e-62
																									91.8	1.51185e-62	1.65627e-62
																									91.9	1.18526e-62	1.29835e-62
																									92	9.29119e-63	1.01766e-62
																									92.1	7.28253e-63	7.97574e-63
																									92.2	5.7075e-63	6.25015e-63
																									92.3	4.47263e-63	4.89737e-63
																									92.4	3.50455e-63	3.83698e-63
																									92.5	2.74572e-63	3.00586e-63
																									92.6	2.15096e-63	2.35452e-63
																									92.7	1.68486e-63	1.84411e-63
																									92.8	1.31961e-63	1.4442e-63
																									92.9	1.03343e-63	1.13089e-63
																									93	8.09233e-64	8.85457e-64
																									93.1	6.33603e-64	6.93215e-64
																									93.2	4.96038e-64	5.42653e-64
																									93.3	3.88299e-64	4.24747e-64
																									93.4	3.03928e-64	3.32424e-64
																									93.5	2.37864e-64	2.6014e-64
																									93.6	1.86141e-64	2.03553e-64
																									93.7	1.45649e-64	1.59258e-64
																									93.8	1.13954e-64	1.24589e-64
																									93.9	8.91461e-65	9.74563e-65
																									94	6.97318e-65	7.62246e-65
																									94.1	5.45397e-65	5.96122e-65
																									94.2	4.26529e-65	4.66154e-65
																									94.3	3.33533e-65	3.64483e-65
																									94.4	2.60786e-65	2.84957e-65
																									94.5	2.03884e-65	2.2276e-65
																									94.6	1.59381e-65	1.74119e-65
																									94.7	1.24579e-65	1.36086e-65
																									94.8	9.73655e-66	1.06349e-65
																									94.9	7.60889e-66	8.31012e-66
																									95	5.94555e-66	6.49287e-66
																									95.1	4.64534e-66	5.07248e-66
																									95.2	3.62908e-66	3.9624e-66
																									95.3	2.83486e-66	3.09494e-66
																									95.4	2.21422e-66	2.41713e-66
																									95.5	1.72928e-66	1.88757e-66
																									95.6	1.3504e-66	1.47387e-66
																									95.7	1.05443e-66	1.15073e-66
																									95.8	8.23237e-67	8.98337e-67
																									95.9	6.4267e-67	7.01232e-67
																									96	5.01656e-67	5.47317e-67
																									96.1	3.91543e-67	4.27141e-67
																									96.2	3.05567e-67	3.33318e-67
																									96.3	2.38446e-67	2.60077e-67
																									96.4	1.8605e-67	2.02908e-67
																									96.5	1.45152e-67	1.5829e-67
																									96.6	1.13232e-67	1.2347e-67
																									96.7	8.83232e-68	9.62999e-68
																									96.8	6.88865e-68	7.51009e-68
																									96.9	5.37216e-68	5.85625e-68
																									97	4.18908e-68	4.56615e-68
																									97.1	3.26621e-68	3.55988e-68
																									97.2	2.5464e-68	2.77509e-68
																									97.3	1.98501e-68	2.16309e-68
																									97.4	1.54723e-68	1.68588e-68
																									97.5	1.20588e-68	1.31382e-68
																									97.6	9.39737e-69	1.02376e-68
																									97.7	7.3226e-69	7.97663e-69
																									97.8	5.70533e-69	6.21435e-69
																									97.9	4.44479e-69	4.84091e-69
																									98	3.46241e-69	3.77064e-69
																									98.1	2.69687e-69	2.93669e-69
																									98.2	2.10039e-69	2.28696e-69
																									98.3	1.63566e-69	1.7808e-69
																									98.4	1.27363e-69	1.38652e-69
																									98.5	9.91634e-70	1.07943e-69
																									98.6	7.71995e-70	8.4027e-70
																									98.7	6.00943e-70	6.54033e-70
																									98.8	4.67744e-70	5.09022e-70
																									98.9	3.64032e-70	3.96122e-70
																									99	2.83288e-70	3.08233e-70
																									99.1	2.20431e-70	2.3982e-70
																									99.2	1.71503e-70	1.86573e-70
																									99.3	1.33423e-70	1.45133e-70
																									99.4	1.03787e-70	1.12887e-70
																									99.5	8.0726e-71	8.7796e-71
																									99.6	6.27827e-71	6.82753e-71
																									99.7	4.88229e-71	5.30896e-71
																									99.8	3.79632e-71	4.12773e-71
																									99.9	2.95161e-71	3.20901e-71
																									100	2.29463e-71	2.49452e-71
																									100.1	1.78371e-71	1.93892e-71
																									100.2	1.3864e-71	1.50692e-71
																									100.3	1.07749e-71	1.17105e-71
																									100.4	8.37326e-72	9.09953e-72
																									100.5	6.50627e-72	7.07e-72
																									100.6	5.05507e-72	5.49259e-72
																									100.7	3.92716e-72	4.2667e-72
																									100.8	3.05062e-72	3.31409e-72
																									100.9	2.36948e-72	2.57391e-72
																									101	1.84025e-72	1.99885e-72
																									101.1	1.42908e-72	1.55211e-72
																									101.2	1.10967e-72	1.2051e-72
																									101.3	8.61568e-73	9.35585e-73
																									101.4	6.6887e-73	7.26271e-73
																									101.5	5.1922e-73	5.63732e-73
																									101.6	4.03012e-73	4.37525e-73
																									101.7	3.12783e-73	3.3954e-73
																									101.8	2.42731e-73	2.63474e-73
																									101.9	1.88349e-73	2.04428e-73
																									102	1.46137e-73	1.586e-73
																									102.1	1.13375e-73	1.23033e-73
																									102.2	8.79485e-74	9.54328e-74
																									102.3	6.8218e-74	7.40171e-74
																									102.4	5.29086e-74	5.74016e-74
																									102.5	4.1031e-74	4.45117e-74
																									102.6	3.18168e-74	3.4513e-74
																									102.7	2.46693e-74	2.67577e-74
																									102.8	1.91257e-74	2.0743e-74
																									102.9	1.48263e-74	1.60788e-74
																									103	1.14924e-74	1.24622e-74
																									103.1	8.90723e-75	9.65812e-75
																									103.2	6.90294e-75	7.48426e-75
																									103.3	5.34913e-75	5.79914e-75
																									103.4	4.14468e-75	4.493e-75
																									103.5	3.21112e-75	3.48071e-75
																									103.6	2.4876e-75	2.69623e-75
																									103.7	1.92692e-75	2.08836e-75
																									103.8	1.49247e-75	1.61737e-75
																									103.9	1.15586e-75	1.25249e-75
																									104	8.95078e-76	9.69835e-76
																									104.1	6.9307e-76	7.50895e-76
																									104.2	5.36601e-76	5.81326e-76
																									104.3	4.15417e-76	4.50006e-76
																									104.4	3.2157e-76	3.48317e-76
																									104.5	2.48901e-76	2.69582e-76
																									104.6	1.92635e-76	2.08625e-76
																									104.7	1.49074e-76	1.61436e-76
																									104.8	1.15353e-76	1.24908e-76
																									104.9	8.9251e-77	9.66367e-77
																									105	6.90489e-77	7.4757e-77
																									105.1	5.34145e-77	5.78257e-77
																									105.2	4.13162e-77	4.47248e-77
																									105.3	3.19551e-77	3.45888e-77
																									105.4	2.47127e-77	2.67474e-77
																									105.5	1.91099e-77	2.06817e-77
																									105.6	1.4776e-77	1.599e-77
																									105.7	1.14238e-77	1.23615e-77
																									105.8	8.83136e-78	9.55552e-78
																									105.9	6.82656e-78	7.38577e-78
																									106	5.27638e-78	5.70816e-78
																									106.1	4.07783e-78	4.41119e-78
																									106.2	3.15124e-78	3.4086e-78
																									106.3	2.43496e-78	2.63363e-78
																									106.4	1.88132e-78	2.03466e-78
																									106.5	1.45343e-78	1.57177e-78
																									106.6	1.12275e-78	1.21408e-78
																									106.7	8.67227e-79	9.37697e-79
																									106.8	6.69794e-79	7.24167e-79
																									106.9	5.1726e-79	5.59209e-79
																									107	3.99427e-79	4.31787e-79
																									107.1	3.08407e-79	3.33368e-79
																									107.2	2.38107e-79	2.57358e-79
																									107.3	1.83814e-79	1.98661e-79
																									107.4	1.41888e-79	1.53337e-79
																									107.5	1.09514e-79	1.18342e-79
																									107.6	8.45194e-80	9.1326e-80
																									107.7	6.52232e-80	7.04706e-80
																									107.8	5.03277e-80	5.43728e-80
																									107.9	3.88305e-80	4.19483e-80
																									108	2.9957e-80	3.236e-80
																									108.1	2.31091e-80	2.4961e-80
																									108.2	1.7825e-80	1.9252e-80
																									108.3	1.37478e-80	1.48473e-80
																									108.4	1.06023e-80	1.14494e-80
																									108.5	8.17571e-81	8.82829e-81
																									108.6	6.30393e-81	6.80661e-81
																									108.7	4.86024e-81	5.24741e-81
																									108.8	3.74683e-81	4.04502e-81
																									108.9	2.88822e-81	3.11785e-81
																									109	2.22616e-81	2.40298e-81
																									109.1	1.71571e-81	1.85185e-81
																									109.2	1.32218e-81	1.427e-81
																									109.3	1.01882e-81	1.09951e-81
																									109.4	7.84996e-82	8.47104e-82
																									109.5	6.04779e-82	6.52581e-82
																									109.6	4.65893e-82	5.02681e-82
																									109.7	3.58869e-82	3.87179e-82
																									109.8	2.76405e-82	2.98189e-82
																									109.9	2.12871e-82	2.29632e-82
																									110	1.63926e-82	1.76821e-82
																									110.1	1.26224e-82	1.36143e-82
																									110.2	9.7184e-83	1.04813e-82
																									110.3	7.48185e-83	8.06864e-83
																									110.4	5.75948e-83	6.21076e-83
																									110.5	4.43322e-83	4.78024e-83
																									110.6	3.41205e-83	3.67888e-83
																									110.7	2.62587e-83	2.83102e-83
																									110.8	2.02065e-83	2.17837e-83
																									110.9	1.55479e-83	1.67602e-83
																									111	1.19622e-83	1.28941e-83
																									111.1	9.20264e-84	9.91886e-84
																									111.2	7.07905e-84	7.62946e-84
																									111.3	5.44501e-84	5.86797e-84
																									111.4	4.18778e-84	4.51276e-84
																									111.5	3.22054e-84	3.47023e-84
																									111.6	2.47649e-84	2.66831e-84
																									111.7	1.90417e-84	2.05151e-84
																									111.8	1.46398e-84	1.57715e-84
																									111.9	1.12545e-84	1.21237e-84
																									112	8.65124e-85	9.31877e-85
																									112.1	6.64955e-85	7.16214e-85
																									112.2	5.11054e-85	5.50413e-85
																									112.3	3.92739e-85	4.22956e-85
																									112.4	3.01788e-85	3.24986e-85
																									112.5	2.31879e-85	2.49686e-85
																									112.6	1.78149e-85	1.91817e-85
																									112.7	1.36857e-85	1.47347e-85
																									112.8	1.05126e-85	1.13176e-85
																									112.9	8.07452e-86	8.69226e-86
																									113	6.20133e-86	6.67531e-86
																									113.1	4.76227e-86	5.12592e-86
																									113.2	3.65684e-86	3.93581e-86
																									113.3	2.80775e-86	3.02175e-86
																									113.4	2.15563e-86	2.31977e-86
																									113.5	1.65482e-86	1.78071e-86
																									113.6	1.27025e-86	1.36679e-86
																									113.7	9.74969e-87	1.049e-86
																									113.8	7.48261e-87	8.05025e-87
																									113.9	5.7422e-87	6.1774e-87
																									114	4.40621e-87	4.73984e-87
																									114.1	3.38076e-87	3.6365e-87
																									114.2	2.59373e-87	2.78976e-87
																									114.3	1.98975e-87	2.13999e-87
																									114.4	1.52628e-87	1.64141e-87
																									114.5	1.17066e-87	1.25889e-87
																									114.6	8.97822e-88	9.65425e-88
																									114.7	6.88513e-88	7.40308e-88
																									114.8	5.27955e-88	5.67634e-88
																									114.9	4.04802e-88	4.35198e-88
																									115	3.1035e-88	3.33632e-88
																									115.1	2.37916e-88	2.55747e-88
																									115.2	1.82372e-88	1.96027e-88
																									115.3	1.39783e-88	1.5024e-88
																									115.4	1.0713e-88	1.15137e-88
																									115.5	8.20982e-89	8.82287e-89
																									115.6	6.29097e-89	6.7603e-89
																									115.7	4.82019e-89	5.17946e-89
																									115.8	3.69295e-89	3.96795e-89
																									115.9	2.82908e-89	3.03955e-89
																									116	2.1671e-89	2.32818e-89
																									116.1	1.65988e-89	1.78314e-89
																									116.2	1.27127e-89	1.36559e-89
																									116.3	9.73551e-90	1.04572e-89
																									116.4	7.45494e-90	8.00704e-90
																									116.5	5.70811e-90	6.13046e-90
																									116.6	4.37023e-90	4.69329e-90
																									116.7	3.34563e-90	3.59273e-90
																									116.8	2.56103e-90	2.75001e-90
																									116.9	1.96027e-90	2.10478e-90
																									117	1.5003e-90	1.6108e-90
																									117.1	1.14817e-90	1.23266e-90
																									117.2	8.78605e-91	9.43201e-91
																									117.3	6.72273e-91	7.21655e-91
																									117.4	5.14353e-91	5.521e-91
																									117.5	3.93496e-91	4.22347e-91
																									117.6	3.0101e-91	3.23061e-91
																									117.7	2.30243e-91	2.47094e-91
																									117.8	1.76098e-91	1.88975e-91
																									117.9	1.34675e-91	1.44514e-91
																									118	1.02987e-91	1.10504e-91
																									118.1	7.8748e-92	8.44907e-92
																									118.2	6.0209e-92	6.45958e-92
																									118.3	4.60305e-92	4.93813e-92
																									118.4	3.5188e-92	3.77472e-92
																									118.5	2.68972e-92	2.88516e-92
																									118.6	2.05581e-92	2.20505e-92
																									118.7	1.57116e-92	1.68512e-92
																									118.8	1.20067e-92	1.28768e-92
																									118.9	9.17465e-93	9.83894e-93
																									119	7.01002e-93	7.51712e-93
																									119.1	5.35566e-93	5.74274e-93
																									119.2	4.09138e-93	4.38682e-93
																									119.3	3.12529e-93	3.35077e-93
																									119.4	2.38713e-93	2.5592e-93
																									119.5	1.82316e-93	1.95446e-93
																									119.6	1.39231e-93	1.49249e-93
																									119.7	1.06319e-93	1.13963e-93
																									119.8	8.11805e-94	8.70114e-94
																									119.9	6.19805e-94	6.64285e-94
																									120	4.73176e-94	5.07103e-94
																									120.1	3.61206e-94	3.87081e-94
																									120.2	2.75709e-94	2.95442e-94
																									120.3	2.10431e-94	2.25479e-94
																									120.4	1.60596e-94	1.7207e-94
																									120.5	1.22552e-94	1.31301e-94
																									120.6	9.35133e-95	1.00183e-94
																									120.7	7.13493e-95	7.64335e-95
																									120.8	5.44339e-95	5.83094e-95
																									120.9	4.15254e-95	4.44793e-95
																									121	3.16754e-95	3.39267e-95
																									121.1	2.41599e-95	2.58755e-95
																									121.2	1.84261e-95	1.97333e-95
																									121.3	1.40519e-95	1.50479e-95
																									121.4	1.07152e-95	1.14741e-95
																									121.5	8.17016e-96	8.74828e-96
																									121.6	6.22909e-96	6.66949e-96
																									121.7	4.7488e-96	5.08424e-96
																									121.8	3.61999e-96	3.87548e-96
																									121.9	2.75928e-96	2.95385e-96
																									122	2.10304e-96	2.25121e-96
																									122.1	1.60275e-96	1.71557e-96
																									122.2	1.22137e-96	1.30727e-96
																									122.3	9.30664e-97	9.96062e-97
																									122.4	7.09094e-97	7.58879e-97
																									122.5	5.40231e-97	5.78127e-97
																									122.6	4.11547e-97	4.40391e-97
																									122.7	3.13491e-97	3.35443e-97
																									122.8	2.38778e-97	2.55484e-97
																									122.9	1.81856e-97	1.94569e-97
																									123	1.38493e-97	1.48166e-97
																									123.1	1.05461e-97	1.12821e-97
																									123.2	8.0301e-98	8.59001e-98
																									123.3	6.11385e-98	6.53978e-98
																									123.4	4.65451e-98	4.97849e-98
																									123.5	3.54321e-98	3.78963e-98
																									123.6	2.69703e-98	2.88444e-98
																									123.7	2.05277e-98	2.19529e-98
																									123.8	1.56228e-98	1.67065e-98
																									123.9	1.18889e-98	1.27129e-98
																									124	9.04672e-99	9.6732e-99
																									124.1	6.88343e-99	7.3597e-99
																									124.2	5.23702e-99	5.59906e-99
																									124.3	3.98409e-99	4.25928e-99
																									124.4	3.03067e-99	3.23982e-99
																									124.5	2.30522e-99	2.46418e-99
																									124.6	1.75329e-99	1.87408e-99
																									124.7	1.33339e-99	1.42518e-99
																									124.8	1.01398e-99	1.08372e-99
																									124.9	7.71019e-100	8.24004e-100
																									125	5.86228e-100	6.26479e-100
																									125.1	4.4569e-100	4.76266e-100
																									125.2	3.38817e-100	3.62042e-100
																									125.3	2.57551e-100	2.7519e-100
																									125.4	1.95761e-100	2.09157e-100
																									125.5	1.48783e-100	1.58956e-100
																									125.6	1.1307e-100	1.20795e-100
																									125.7	8.59227e-101	9.17876e-101
																									125.8	6.5288e-101	6.97407e-101
																									125.9	4.96049e-101	5.29851e-101
																									126	3.76861e-101	4.02519e-101
																									126.1	2.86288e-101	3.05764e-101
																									126.2	2.17466e-101	2.32247e-101
																									126.3	1.65175e-101	1.76393e-101
																									126.4	1.25448e-101	1.33961e-101
																									126.5	9.52684e-102	1.01728e-101
																									126.6	7.23435e-102	7.72444e-102
																									126.7	5.49309e-102	5.8649e-102
																									126.8	4.17061e-102	4.45267e-102
																									126.9	3.16627e-102	3.38023e-102
																									127	2.4036e-102	2.56589e-102
																									127.1	1.82449e-102	1.94758e-102
																									127.2	1.38481e-102	1.47815e-102
																									127.3	1.051e-102	1.12178e-102
																									127.4	7.97589e-103	8.51262e-103
																									127.5	6.05234e-103	6.45929e-103
																									127.6	4.59234e-103	4.90087e-103
																									127.7	3.48426e-103	3.71815e-103
																									127.8	2.64334e-103	2.82063e-103
																									127.9	2.00522e-103	2.1396e-103
																									128	1.52103e-103	1.62288e-103
																									128.1	1.15366e-103	1.23085e-103
																									128.2	8.74955e-104	9.33446e-104
																									128.3	6.63528e-104	7.07849e-104
																									128.4	5.03152e-104	5.36733e-104
																									128.5	3.8151e-104	4.06951e-104
																									128.6	2.89253e-104	3.08526e-104
																									128.7	2.19289e-104	2.33888e-104
